# Supplementary material for: Diamine-mediated degradative dimerisation of Morita–Baylis–Hillman ketones
Source: Royal Society of Chemistry journal article supplement (doi:10.1039/c9cc10068g), 2020-01-01

## Diamine-Mediated Degradative Dimerisation of Morita-Baylis-Hillman Ketones

Ajit Kumar Jha, Anju Kumari and Srinivasan Easwar\*

*Department of Chemistry, School of Chemical Sciences and Pharmacy, Central University of Rajasthan, NH-8, Bandarsindri, Distt. Ajmer, Rajasthan 305817*

Ph.: +91-1463-238755

Fax: +91-1463-238722

e-mail: [easwar.srinivasan@curaj.ac.in](mailto:easwar.srinivasan@curaj.ac.in)

### **SUPPORTING INFORMATION**

#### **Contents**

| <b>S. No.</b> | <b>Detail</b>                                                            | <b>Page No.</b> |
|---------------|--------------------------------------------------------------------------|-----------------|
| 1             | General experimental details and procedures                              | 2               |
| 2             | Tabulated data of the synthesised products                               | 3               |
| 3             | Experimental details of the Nash test                                    | 11              |
| 4             | References                                                               | 11              |
| 5             | $^1\text{H}$ and $^{13}\text{C}$ NMR spectra of the synthesised products | 12              |

## General

The aldehydes and diamine used in the study were purchased from Sigma-Aldrich. Ethylenediamine was distilled prior to use. Anhydrous ethylenediamine was prepared following a literature protocol.<sup>1</sup> Solvents were distilled for the reactions. IBX was synthesised from 2-iodobenzoic acid following a literature protocol.<sup>2</sup> Synthesis of Morita-Baylis-Hillman adducts and their oxidation were performed using reported protocols.<sup>3</sup> Silica gel (100-200 mesh) and other common reagents were procured from local suppliers. Proton and carbon nuclear magnetic resonance spectra were recorded on a Bruker Avance 500 MHz and 400 MHz NMR spectrometer. Elemental analysis was recorded on Thermo Finnigan FLASH EA 1112. High resolution mass spectral analysis (HRMS) was performed on a XEVO G2-S QT instrument of Waters Corporation, USA.

## Experimental Section

### **General procedure for the synthesis of methylene-bridged bis-1,3-dicarbonyl compounds:**

MBH ketone **1** (0.5 mmol) was dissolved in dioxane (500  $\mu$ L) followed by the addition of ethylene-1,2-diamine (**2c**, 0.6 mmol) to the reaction flask. The resulting reaction mixture was allowed to stir at room temperature for the time mentioned in **Table 2** of the manuscript for the respective adducts. The crude residue was directly subjected to the silica gel chromatography (EtOAc: petroleum ether) to obtain pure **3** (as a mixture of two diastereomers; ratio mentioned for each adduct in the tabulation section below).

### **One pot protocol for the synthesis of dimethyl 2,4-dibenzoylpentanedioate (**3a**) from Morita-Baylis-Hillman adduct **4**:**

MBH adduct **4** (96 mg, 0.5 mmol) was dissolved in CH<sub>3</sub>CN (4 mL) followed by the addition IBX (210 mg, 0.75 mmol). The resulting mixture was allowed to stir at 80 °C and the progress of the reaction was monitored using thin layer chromatography. After 5 h, upon complete consumption of **4**, the reaction mixture was cooled to room temperature followed by the addition of ethylene-1, 2-diamine (**2c**, 40  $\mu$ L, 0.6 mmol) to the reaction flask. The resulting reaction mixture was allowed to stir at room temperature for 40 min. The reaction mixture was filtered and the solvent was removed under reduced pressure. The crude residue was subjected to the silica gel chromatography (EtOAc: petroleum ether, 2:8) to obtain pure **3a** as a white solid; yield (mixture of two diastereomers): 67 mg (73%).

### Tabulated data of the synthesised products:

#### Dimethyl 2,4-dibenzoylpentanedioate (3a):<sup>4</sup>

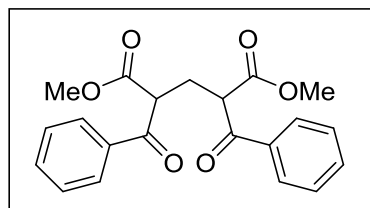

Purified by silica gel chromatography (EtOAc: petroleum ether, 2:8)

Yield: 81 mg (88%); White solid; The ratio of the two diastereomers is 1.4:1; **Two diastereomers:** <sup>1</sup>H NMR (500 MHz, CDCl<sub>3</sub>): δ 2.54-2.79 (m, 2H), 3.62 (s, 2.47H), 3.74 (s, 3.54H), 4.59 (t, *J* = 7.5 Hz, 0.82H), 4.68 (t, *J* = 7.5 Hz, 1.14H), 7.44-7.53 (m, 4H), 7.55-7.63 (m, 2H), 8.02-8.09 (m, 4H); <sup>13</sup>C NMR (100 MHz, CDCl<sub>3</sub>): δ 27.80, 28.35, 51.03, 51.28, 52.66, 128.85, 128.88, 128.95, 133.91, 133.93, 135.30, 135.76, 169.80, 170.20, 194.70, 195.09; HRMS (ESI-TOF): *m/z* [M+Na]<sup>+</sup> calculated for C<sub>21</sub>H<sub>20</sub>O<sub>6</sub>Na: 391.1152; found 391.1285.

#### Dimethyl 2,4-bis(4-fluorobenzoyl)pentanedioate (3b):<sup>4</sup>

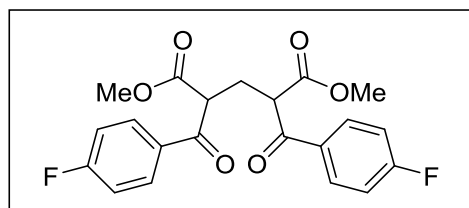

Purified by silica gel chromatography (EtOAc: petroleum ether, 1.5:8.5)

Yield: 95 mg (94%); Light yellow semi-solid; The ratio of the two diastereomers is 2.6:1; **Two diastereomers:** <sup>1</sup>H NMR (500 MHz, CDCl<sub>3</sub>): δ 2.49-2.75 (m, 2H), 3.64 (s, 1.68H), 3.75 (s, 4.32H), 4.53 (t, *J* = 7.5 Hz, 0.61H), 4.63 (t, *J* = 7.5 Hz, 1.46H), 7.11-7.21 (m, 4H), 8.05-8.14 (m, 4H); <sup>13</sup>C NMR (125 MHz, CDCl<sub>3</sub>): 27.65, 28.30, 50.96, 51.19, 52.73, 116.09 (d, *J* = 22.0 Hz), 131.64 (d, *J* = 9.0 Hz), 131.78 (d, *J* = 10.0 Hz), 132.15 (d, *J* = 3.0 Hz), 166.26 (d, *J* = 255.0 Hz), 169.61, 170.10, 193.09, 193.54.

#### Dimethyl 2,4-bis(4-chlorobenzoyl)pentanedioate (3c):<sup>4</sup>

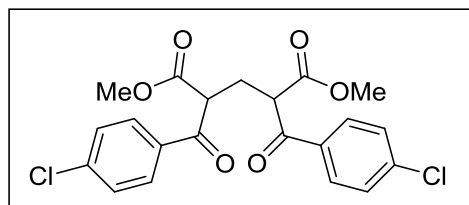

Purified by silica gel chromatography (EtOAc: petroleum ether, 1.5:8.5)

Yield: 93 mg (85%); White solid; The ratio of the two diastereomers is 1.7:1; **Two diastereomers:** <sup>1</sup>H NMR (500 MHz, CDCl<sub>3</sub>): δ 2.49-2.74 (m, 2H), 3.64 (s, 2.19H), 3.74 (s, 3.81H), 4.51 (t, *J* = 7.5 Hz, 0.79H), 4.61 (t, *J* = 7.5 Hz, 1.30 H), 7.42-7.50 (m, 4H), 7.96-8.03 (m, 4H); <sup>13</sup>C NMR (125 MHz, CDCl<sub>3</sub>):

27.52, 28.15, 50.94, 51.73, 52.79, 129.26, 130.26, 130.37, 133.56, 134.02, 140.57, 140.62, 169.51, 169.97, 193.47, 193.91.

**Dimethyl 2,4-bis(4-bromobenzoyl)pentanedioate (3d):**<sup>4</sup>

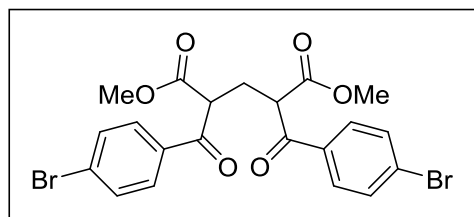

Purified by silica gel chromatography (EtOAc: petroleum ether, 1.5:8.5)

Yield: 111 mg (85%); Light yellow solid; The ratio of the two diastereomers is 1.9:1; **Two diastereomers:** <sup>1</sup>H NMR (500 MHz, CDCl<sub>3</sub>): δ 2.49-2.74 (m, 2H) 3.64 (s, 2.09H), 3.74 (s, 3.91H), 4.50 (t, *J* = 7.5 Hz, 0.76H), 4.60 (t, *J* = 7.0 Hz, 1.34H), 7.61-7.66 (m, 4H), 7.87-7.94 (m, 4H); <sup>13</sup>C NMR (125 MHz, CDCl<sub>3</sub>): 27.49, 28.10, 50.93, 51.10, 52.79, 52.80, 129.38, 129.44, 130.31, 130.42, 132.26, 134.01, 134.45, 169.47, 169.90, 193.67, 194.09.

**Dimethyl 2,4-bis(4-methoxybenzoyl)pentanedioate (3e):**<sup>4</sup>

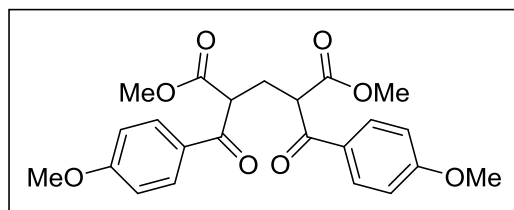

Purified by silica gel chromatography (EtOAc: petroleum ether, 2:8)

Yield: 80 mg (74%); light yellow gum; The ratio of the two diastereomers is 1.4:1; **Two diastereomers:** <sup>1</sup>H NMR (500 MHz, CDCl<sub>3</sub>): δ 2.49-2.74 (m, 2H), 3.63 (s, 2.47H), 3.74 (s, 3.52H), 3.85 (s, 3.59H), 3.87 (s, 2.51H), 4.52 (t, *J* = 7.5 Hz, 0.83H), 4.60 (t, *J* = 7.5 Hz, 1.15H), 6.93 (d, *J* = 8.5 Hz, 2.38H), 6.96 (d, *J* = 9.0 Hz, 1.75H), 8.04 (d, *J* = 8.5 Hz, 4H); <sup>13</sup>C NMR (125 MHz, CDCl<sub>3</sub>): 28.06, 28.70, 50.81, 51.08, 52.52, 55.52, 55.54, 114.05, 114.06, 128.31, 128.80, 131.30, 131.40, 164.16, 170.02, 170.46, 193.18, 193.61.

**Dimethyl 2,4-bis(4-methylbenzoyl)pentanedioate (3f):**<sup>4</sup>

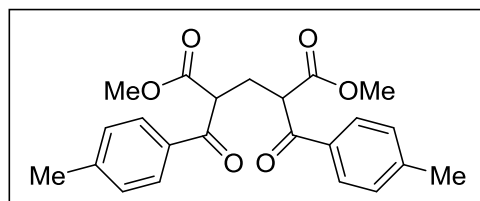

Purified by silica gel chromatography (EtOAc: petroleum ether, 1.5:8.5)

Yield: 82 mg (82 %); White semi-solid; The ratio of the two diastereomers is 1.6:1; **Two diastereomers:** <sup>1</sup>H NMR (500 MHz, CDCl<sub>3</sub>): δ 2.40 (s, 3.74H), 2.42 (s, 2.50H), 2.52-2.76 (m, 2H), 3.63 (s, 2.31H), 3.74 (s, 3.69H), 4.55 (t, *J* = 7.5 Hz, 0.82H), 4.63 (t, *J* = 7.5 Hz, 1.26H), 7.26 (d, *J* = 8.0 Hz, 2.52H), 7.30 (d, *J*

= 8.5 Hz, 1.68H), 7.94 (d,  $J = 8.0$  Hz, 4H);  $^{13}\text{C}$  NMR (125 MHz,  $\text{CDCl}_3$ ): 21.70, 27.90, 28.46, 50.96, 51.22, 52.58, 129.00, 129.09, 129.56, 129.58, 132.87, 133.32, 144.91, 169.94, 170.31, 194.30, 194.70.

**Dimethyl 2,4-bis(4-nitrobenzoyl)pentanedioate (3g):**

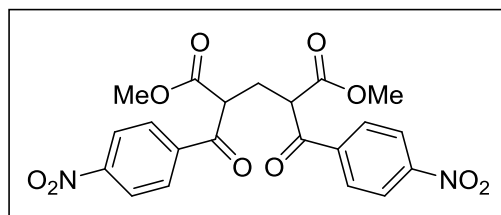

Purified by silica gel chromatography (EtOAc: petroleum ether, 2:8)

Yield: 42 mg (37%); yellow gum; The ratio of the two diastereomers is 1.2:1; **Two diastereomers:**  $^1\text{H}$  NMR (500 MHz,  $\text{CDCl}_3$ ):  $\delta$  2.54-2.80 (m, 2H), 3.67 (s, 2.79H), 3.78 (s, 3.20H), 4.61 (t,  $J = 7.0$  Hz, 0.94H), 4.72 (t,  $J = 7.0$  Hz, 1.10H), 8.21 (d,  $J = 9.0$  Hz, 1.91H), 8.26 (d,  $J = 8.5$  Hz, 2.25H), 8.34-8.39 (m, 4H);  $^{13}\text{C}$  NMR (125 MHz,  $\text{CDCl}_3$ ): 27.06, 27.66, 51.24, 51.39, 53.04, 53.05, 124.10, 129.83, 130.00, 139.70, 140.14, 150.78, 150.81, 169.02, 169.50, 193.29, 193.62.; Anal. calculated for  $\text{C}_{21}\text{H}_{18}\text{N}_2\text{O}_{10}$ : C, 55.03; H, 3.96; N, 6.11; found C, 55.12; H, 3.91; N, 6.18.

**Dimethyl 2,4-bis(4-cyanobenzoyl)pentanedioate (3h):**

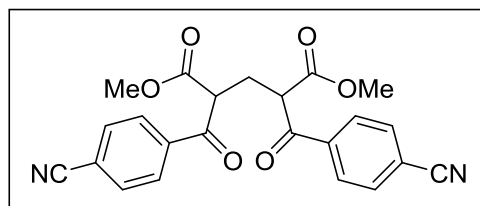

Purified by silica gel chromatography (EtOAc: petroleum ether, 2:8)

Yield: 30 mg (29%); white semi-solid; The ratio of the two diastereomers is 1.2:1; **Two diastereomers:**  $^1\text{H}$  NMR (500 MHz,  $\text{CDCl}_3$ ):  $\delta$  2.50-2.76 (m, 2H), 3.66 (s, 2.73H), 3.76 (s, 3.28H), 4.56 (t,  $J = 7.0$  Hz, 0.94H), 4.68 (t,  $J = 7.0$  Hz, 1.12H), 7.80-7.84 (m, 4H), 8.14 (d,  $J = 8.5$  Hz, 1.87H), 8.18 (d,  $J = 8.5$  Hz, 2.35H);  $^{13}\text{C}$  NMR (100 MHz,  $\text{CDCl}_3$ ): 27.10, 27.73, 51.02, 51.19, 53.00, 53.02, 117.22, 117.26, 117.68, 129.17, 129.33, 132.75, 132.77, 138.18, 138.64, 169.08, 169.60, 193.46, 193.82; Anal. calculated for  $\text{C}_{23}\text{H}_{18}\text{N}_2\text{O}_6$ : C, 66.03; H, 4.34; N, 6.70; found C, 66.12; H, 4.38; N, 6.65.

**Dimethyl 2,4-bis(3-chlorobenzoyl)pentanedioate (3i):**

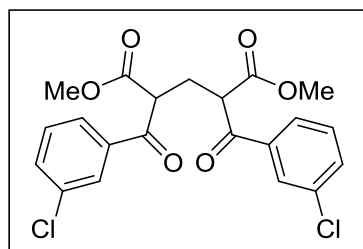

Purified by silica gel chromatography (EtOAc: petroleum ether, 1.5:8.5)

Yield: 73 mg (66%); transparent oil; The ratio of the two diastereomers is 1.4:1; **Two diastereomers:**  $^1\text{H}$  NMR (500 MHz,  $\text{CDCl}_3$ ):  $\delta$  2.52-2.76 (m, 2H), 3.66 (s, 2.53H), 3.76 (s, 3.46H), 4.51 (t,  $J = 7.0$  Hz, 0.87H), 4.60 (s, 1.15H), 7.40-7.49 (m, 2H), 7.58 (t,  $J = 9.5$  Hz, 2H), 7.90-7.96 (m, 2H), 8.00 (d,  $J = 10.0$  Hz, 2H);  $^{13}\text{C}$  NMR (125 MHz,  $\text{CDCl}_3$ ): 27.48, 28.02, 51.00, 51.19, 52.87, 126.93, 127.06, 128.82, 128.88, 130.25, 133.89, 133.91, 135.30, 135.33, 136.84, 137.25, 169.40, 169.72, 193.45, 193.84; Anal. calculated for  $\text{C}_{21}\text{H}_{18}\text{Cl}_2\text{O}_6$ : C, 57.68; H, 4.15; found C, 57.76; H, 4.19.

**Dimethyl 2,4-bis(3-methoxybenzoyl)pentanedioate (3j):<sup>4</sup>**

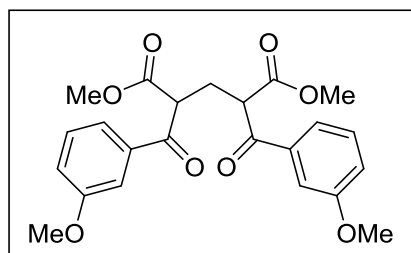

Purified by silica gel chromatography (EtOAc: petroleum ether, 2:8)

Yield: 107 mg (90%); white gum; The ratio of the two diastereomers is 1.4:1; **Two diastereomers:**  $^1\text{H}$  NMR (500 MHz,  $\text{CDCl}_3$ ):  $\delta$  2.54-2.79 (m, 2H), 3.65 (s, 2.53H), 3.75 (s, 3.47H), 3.86 (s, 3.64H), 3.89 (s, 2.69H), 4.55 (t,  $J = 7.5$  Hz, 0.89H), 4.64 (t,  $J = 7.0$  Hz, 1.22H), 7.10-7.18 (m, 2H), 7.39 (dt,  $J = 8.0$  Hz, 2H), 7.55-7.59 (m, 2H), 7.62 (d,  $J = 8.0$  Hz, 0.91H), 7.65 (d,  $J = 7.5$  Hz, 1.24H);  $^{13}\text{C}$  NMR (125 MHz,  $\text{CDCl}_3$ ): 27.96, 28.51, 51.22, 51.48, 52.62, 55.50, 112.82, 112.84, 120.68, 120.79, 121.44, 121.55, 129.86, 136.63, 137.10, 160.01, 160.03, 169.79, 170.16, 194.51, 194.93.

**Dimethyl 2,4-di(furan-2-carbonyl)pentanedioate (3k):**

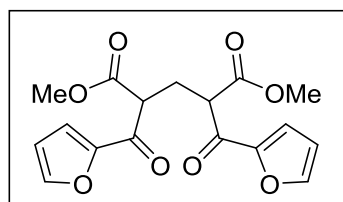

Purified by silica gel chromatography (EtOAc: petroleum ether, 2:8)

Yield: 47 mg (54%); light yellow-orange semi-solid; The ratio of the two diastereomers is 1.2:1; **Two diastereomers:**  $^1\text{H}$  NMR (500 MHz,  $\text{CDCl}_3$ ):  $\delta$  2.62 (dt,  $J = 7.5$  Hz, 2H), 3.68 (s, 2.76H), 3.72 (s, 3.24H), 4.30 (t,  $J = 7.5$  Hz, 0.94H), 4.34 (t,  $J = 7.5$  Hz, 1.07H), 6.54-6.56 (m, 1.02H), 6.57-6.60 (m, 0.96H), 7.37 (d,  $J = 3.5$  Hz, 2H), 7.59 (s, 0.99H), 7.63 (s, 0.91H);  $^{13}\text{C}$  NMR (125 MHz,  $\text{CDCl}_3$ ): 26.92, 27.39, 51.23, 51.27, 52.70, 112.74, 112.75, 119.40, 119.49, 147.52, 147.54, 151.41, 151.60, 169.33, 169.45, 182.85, 182.97; Anal. calculated for  $\text{C}_{17}\text{H}_{16}\text{O}_8$ : C, 58.62; H, 4.63; found C, 58.72; H, 4.68.

### Diethyl 2,4-dibenzoylpentanedioate (3l):<sup>4</sup>

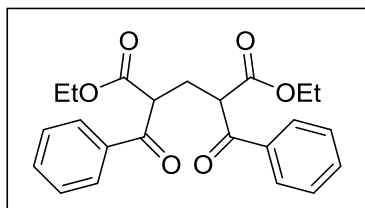

Purified by silica gel chromatography (EtOAc: petroleum ether, 1.5:8.5)

Yield: 74 mg (75%); white solid; The ratio of the two diastereomers is 1.7:1; **Two diastereomers:** <sup>1</sup>H NMR (500 MHz, CDCl<sub>3</sub>): δ 1.10 (t, *J* = 7.0 Hz, 2.23H), 1.21 (t, *J* = 7.5 Hz, 3.77H), 2.54-2.80 (m, 2H), 4.05-4.14 (m, 1.55H), 4.15-4.29 (m, 2.52H), 4.55 (t, *J* = 7.5 Hz, 0.73H), 4.63 (t, *J* = 7.5 Hz, 1.23H), 7.44-7.52 (m, 4H), 7.55-7.62 (m, 2H), 8.05 (d, *J* = 7.5 Hz, 4H); <sup>13</sup>C NMR (125 MHz, CDCl<sub>3</sub>): 13.88, 14.00, 27.68, 28.21, 51.35, 51.59, 61.64, 61.67, 128.80, 128.82, 128.89, 128.91, 133.77, 133.82, 135.43, 135.91, 169.34, 169.69, 194.82, 195.17.

### Diethyl 2,4-bis(4-fluorobenzoyl)pentanedioate (3m):<sup>5</sup>

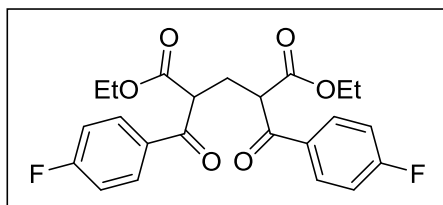

Purified by silica gel chromatography (EtOAc: petroleum ether, 1.5:8.5)

Yield: 97 mg (90%); light yellow gum; The ratio of the two diastereomers is 1.1:1; **Two diastereomers:** <sup>1</sup>H NMR (500 MHz, CDCl<sub>3</sub>): δ 1.12 (t, *J* = 7.5 Hz, 2.76H), 1.22 (t, *J* = 7.5 Hz, 3.13H), 2.50-2.76 (m, 2H), 4.06-4.16 (m, 1.82 H), 4.18-4.27 (m, 2.09H), 4.49 (t, *J* = 7.5 Hz, 0.92H), 4.59 (t, *J* = 7.5 Hz, 1.02H), 7.11-7.20 (m, 4H), 8.05-8.13 (m, 4H); <sup>13</sup>C NMR (125 MHz, CDCl<sub>3</sub>): 13.89, 13.99, 27.52, 28.15, 51.26, 51.47, 61.76, 61.78, 116.01 (d, *J* = 22.0 Hz), 131.59 (d, *J* = 9.5 Hz), 131.73 (d, *J* = 9.0 Hz), 131.81 (d, *J* = 3.0 Hz), 132.31 (d, *J* = 3.0 Hz), 166.20 (d, *J* = 254.0 Hz), 169.14, 169.57, 193.19, 193.60.

### Diethyl 2,4-bis(4-chlorobenzoyl)pentanedioate (3n):<sup>5</sup>

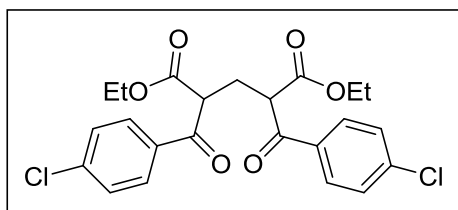

Purified by silica gel chromatography (EtOAc: petroleum ether, 1.5:8.5)

Yield: 85 mg (73%); white solid; The ratio of the two diastereomers is 1.3:1; **Two diastereomers:** <sup>1</sup>H NMR (500 MHz, CDCl<sub>3</sub>): δ 1.13 (t, *J* = 7.5 Hz, 2.60H), 1.22 (t, *J* = 7.0 Hz, 3.60H), 2.50-2.75 (m, 2H), 4.06-4.15 (m, 1.72H), 4.15-4.28 (m, 2.28H), 4.48 (t, *J* = 7.5 Hz, 0.85H), 4.57 (t, *J* = 7.0 Hz, 1.08H), 7.45 (d, *J* = 9.0 Hz, 2.17H), 7.48 (d, *J* = 8.5 Hz, 1.63H), 7.99 (d, *J* = 9.0 Hz, 4H); <sup>13</sup>C NMR (125 MHz, CDCl<sub>3</sub>):

13.90, 13.99, 27.41, 28.00, 51.26, 51.43, 61.81, 61.83, 129.16, 129.18, 130.22, 130.33, 133.75, 134.20, 140.46, 140.48, 169.04, 169.43, 193.57, 193.96.

**Diethyl 2,4-bis(4-bromobenzoyl)pentanedioate (3o):**<sup>5</sup>

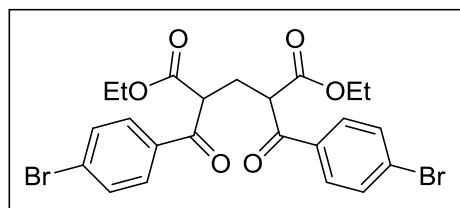

Purified by silica gel chromatography (EtOAc: petroleum ether, 1.5:8.5)

Yield: 127 mg (92%); light yellow solid; The ratio of the two diastereomers is 1.2:1; **Two diastereomers:** <sup>1</sup>H NMR (500 MHz, CDCl<sub>3</sub>): δ 1.12 (t, *J* = 7.5 Hz, 2.66H), 1.21 (t, *J* = 7.0 Hz, 3.39H), 2.49-2.74 (m, 2H), 4.08-4.15 (m, 1.88 H), 4.16-4.26 (m, 2.25H), 4.47 (t, *J* = 7.5 Hz, 0.88H), 4.55 (t, *J* = 7.5 Hz, 1.09H), 7.58-7.66 (m, 4H), 7.91 (d, *J* = 8.0 Hz, 4H); <sup>13</sup>C NMR (125 MHz, CDCl<sub>3</sub>): 13.91, 14.00, 27.38, 27.96, 51.22, 51.38, 61.84, 129.23, 129.28, 130.29, 130.39, 132.18, 134.17, 134.60, 169.00, 169.38, 193.76, 194.15.

**Diethyl 2,4-bis(4-methoxybenzoyl)pentanedioate (3p):**<sup>5</sup>

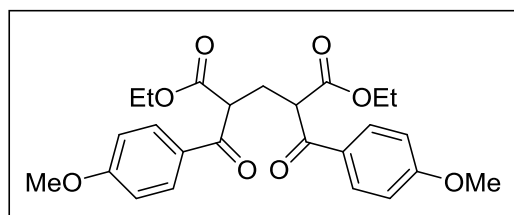

Purified by silica gel chromatography (EtOAc: petroleum ether, 2:8)

Yield: 83 mg (73%); light yellow semi-solid; The ratio of the two diastereomers is 1.1:1; **Two diastereomers:** <sup>1</sup>H NMR (500 MHz, CDCl<sub>3</sub>): δ 1.12 (t, *J* = 7.0 Hz, 2.74H), 1.22 (t, *J* = 7.5 Hz, 3.20H), 2.50-2.74 (m, 2H), 3.85 (s, 3.09H), 3.87 (s, 2.79H), 4.05-4.14 (m, 2.01H), 4.16-4.25 (m, 2.07H), 4.48 (t, *J* = 7.5 Hz, 0.90H), 4.56 (t, *J* = 7.5 Hz, 1.02H), 6.92 (d, *J* = 8.5 Hz, 2.14H), 6.96 (d, *J* = 8.5 Hz, 1.83H), 8.01-8.06 (m, 4H); <sup>13</sup>C NMR (125 MHz, CDCl<sub>3</sub>): 13.93, 14.03, 27.95, 28.58, 51.11, 51.36, 55.50, 55.53, 64.48, 61.51, 113.99, 128.44, 128.94, 131.27, 131.36, 164.08, 164.09, 169.56, 169.94, 193.29, 193.69.

**Diethyl 2,4-bis(4-methylbenzoyl)pentanedioate (3q):**<sup>5</sup>

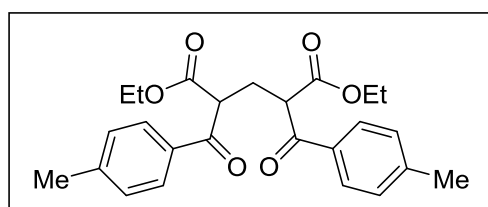

Purified by silica gel chromatography (EtOAc: petroleum ether, 1.5:8.5)

Yield: 84 mg (79%); white solid; The ratio of the two diastereomers is 1.2:1; **Two diastereomers:** <sup>1</sup>H NMR (500 MHz, CDCl<sub>3</sub>): δ 1.12 (t, *J* = 7.0 Hz, 2.66H), 1.22 (t, *J* = 7.5 Hz, 3.35H), 2.40 (s, 3.20H), 2.42 (s, 2.70H), 2.52-2.76 (m, 2H), 4.05-4.15 (m, 1.75 H), 4.16-4.26 (m, 2.19H), 4.51 (t, *J* = 7.5 Hz, 0.87H),



4.59 (t,  $J = 7.5$  Hz, 1.05H), 7.25 (d,  $J = 8.5$  Hz, 2.21H), 7.29 (d,  $J = 8.0$  Hz, 1.74H), 7.94 (t,  $J = 8.5$  Hz, 4H);  $^{13}\text{C}$  NMR (125 MHz,  $\text{CDCl}_3$ ): 13.91, 14.02, 21.68, 21.70, 27.80, 28.33, 51.26, 51.52, 61.53, 61.56, 128.97, 129.05, 129.48, 129.49, 133.02, 133.47, 144.75, 169.47, 169.79, 194.41, 194.76.

**Diethyl 2,4-bis(4-nitrobenzoyl)pentanedioate (3r):<sup>6</sup>**

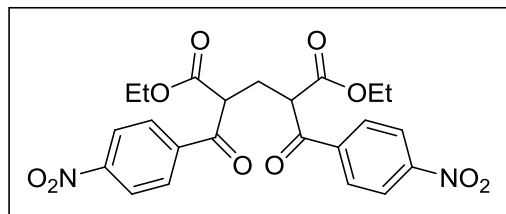

Purified by silica gel chromatography (EtOAc: petroleum ether, 2:8)

Yield: 49 mg (40%); light yellow gum The ratio of the two diastereomers is 1:1; **Two diastereomers:**  $^1\text{H}$  NMR (500 MHz,  $\text{CDCl}_3$ ):  $\delta$  1.13 (t,  $J = 7.5$  Hz, 3H), 1.23 (t,  $J = 7.0$  Hz, 3H), 2.54-2.80 (m, 2H), 4.08-4.16 (m, 2H), 4.18-4.30 (m, 2H), 4.57 (t,  $J = 7.0$  Hz, 1H), 4.68 (t,  $J = 7.0$  Hz, 1H), 8.19-8.27 (m, 4H), 8.33-8.40 (m, 4H);  $^{13}\text{C}$  NMR (125 MHz,  $\text{CDCl}_3$ ): 13.88, 13.96, 26.93, 27.51, 51.55, 51.68, 62.20, 124.02, 124.04, 129.79, 129.96, 139.89, 140.33, 150.72, 150.75, 168.56, 168.98, 193.40, 193.72.

**Diethyl 2,4-bis(3-chlorobenzoyl)pentanedioate (3s):**

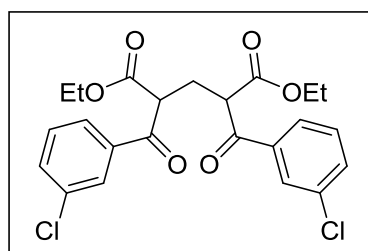

Purified by silica gel chromatography (EtOAc: petroleum ether, 2:8)

Yield: 57 mg (49%); light yellow gum; The ratio of the two diastereomers is 1.1:1; **Two diastereomers:**  $^1\text{H}$  NMR (500 MHz,  $\text{CDCl}_3$ ):  $\delta$  1.14 (t,  $J = 7.0$  Hz, 2.71 H), 1.22 (t,  $J = 7.0$  Hz, 3.30H), 2.53-2.76 (m, 2H), 4.06-4.17 (m, 2.04H), 4.17-4.28 (m, 2.19H), 4.47 (t,  $J = 7.5$  Hz, 0.90H), 4.55 (t,  $J = 7.5$  Hz, 1.01H), 7.40-7.48 (m, 2H), 7.54-7.60 (m, 2H), 7.91-7.95 (m, 2H), 7.98-8.00 (m, 1.07H), 8.00-8.03 (m, 0.87H);  $^{13}\text{C}$  NMR (125 MHz,  $\text{CDCl}_3$ ): 13.87, 13.97, 27.32, 27.82, 51.34, 51.49, 61.90, 126.89, 127.00, 128.80, 128.84, 130.15, 133.74, 133.76, 135.23, 135.25, 137.05, 137.43, 168.92, 169.19, 193.50, 193.84; HRMS (ESI-TOF):  $m/z$   $[\text{M} + \text{Na}]^+$  calculated for  $\text{C}_{23}\text{H}_{22}\text{Cl}_2\text{O}_6\text{Na}$ : 487.0686; found: 487.0688.

**Diethyl 2,4-bis(3-methoxybenzoyl)pentanedioate (3t):<sup>5</sup>**

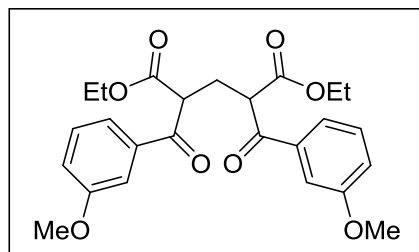

Purified by silica gel chromatography (EtOAc: petroleum ether, 2:8)

Yield: 89 mg (78%); light yellow gum; The ratio of the two diastereomers is 1.1:1; **Two diastereomers:**

<sup>1</sup>H NMR (500 MHz, CDCl<sub>3</sub>):  $\delta$  1.14 (t,  $J = 7.0$  Hz, 2.72H), 1.23 (t,  $J = 7.5$  Hz, 3.20H), 2.54-2.79 (m, 2H), 3.86 (s, 3.18H), 3.89 (s, 2.64H), 4.07-4.16 (m, 1.81H), 4.17-4.27 (m, 2.11H), 4.51 (t,  $J = 7.5$  Hz, 0.92H), 4.59 (t,  $J = 7.5$  Hz, 1.03H), 7.11-7.18 (m, 2H), 7.35-7.43 (m, 2H), 7.55-7.60 (m, 2H), 7.64 (t,  $J = 6.5$  Hz, 2H); <sup>13</sup>C NMR (125 MHz, CDCl<sub>3</sub>): 13.90, 14.00, 27.84, 28.37, 51.53, 51.76, 55.49, 55.50, 61.64, 112.80, 120.58, 120.69, 121.43, 121.53, 129.78, 136.80, 137.26, 159.98, 160.00, 169.33, 169.65, 194.62, 195.00.

**Diethyl 2,4-di(furan-2-carbonyl)pentanedioate (3u):<sup>5</sup>**

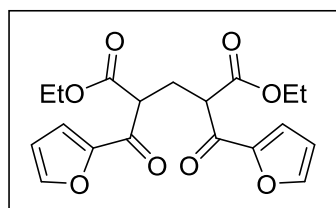

Purified by silica gel chromatography (EtOAc: petroleum ether, 2:8)

Yield: 78 mg (83%); Light yellow semi-solid; The ratio of the two diastereomers is 1:1; **Two**

**diastereomers:** <sup>1</sup>H NMR (500 MHz, CDCl<sub>3</sub>):  $\delta$  1.15 (t,  $J = 7.5$  Hz, 3H), 1.20 (t,  $J = 7.0$  Hz, 3H), 2.56-2.66 (m, 2H), 4.10-4.21 (m, 4H), 4.24-4.31 (m, 2H), 6.52-6.55 (m, 1H), 6.55-6.57 (m, 1H), 7.35 (t,  $J = 3.5$  Hz, 2H), 7.58 (s, 1H), 7.61 (s, 1H); <sup>13</sup>C NMR (125 MHz, CDCl<sub>3</sub>): 13.93, 13.97, 26.78, 27.23, 51.50, 51.58, 61.66, 61.67, 112.62, 112.65, 119.18, 119.27, 147.29, 147.34, 151.48, 151.68, 168.84, 168.94, 182.97, 183.10.

## Experimental details of the Nash test

### General procedure for the Nash test:<sup>7</sup>

Formation of formaldehyde in the reaction was assessed using the Nash Test. The Nash reagent was prepared by dissolving NH<sub>4</sub>OAc (7.5 g, 95 mmol), 2,4-pentanedione (0.1 mL, 1 mmol) and acetic acid (0.15 mL, 2.5 mmol) in 50 mL of water. After obtaining a clear solution, it was stored in the dark.

A typical reaction with the model substrate was set up under the optimised conditions; after completion of the reaction, an aliquot (50  $\mu$ L) was taken out from the reaction mixture and Nash reagent added (5 mL) was added to it. The resulting mixture was allowed to stir on a pre-heated oil-bath at 60  $^{\circ}$ C for 5 min; it was allowed to cool to room temperature. The UV spectrum of the mixture was then recorded, which showed a  $\lambda_{\text{max}}$  at 411 nm. A control test UV spectrum was similarly recorded for formaldehyde treated with the Nash reagent, and a  $\lambda_{\text{max}}$  of 412 nm was observed, to confirm the generation of formaldehyde in the reaction.

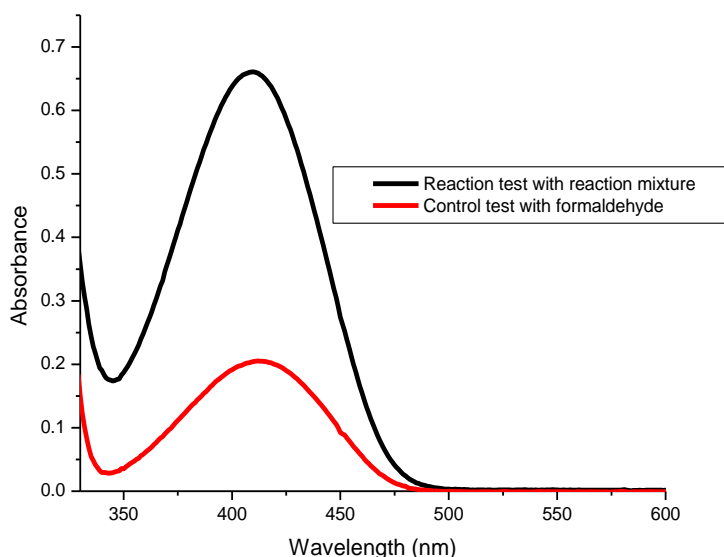

### References:

1. L. M. Mukherjee and S. Bruckenstein, *Pure Appl. Chem.*, 1966, **13**, 419.
2. M. Frigerio, M. Santagostina and S. Sputore, *J. Org. Chem.*, 1999, **64**, 4537.
3. a) A. Latorre, J. A. Saez, S. Rodríguez and F. V. Gonzalez, *Tetrahedron*, 2014, **70**, 97; b) S. M. Santos and F. Coelho, *RSC Adv.*, **2012**, 2, 3237.
4. L. Lu, S. Guo, Q. Xiong, S. Liu, X. Li and H. Cai, *Synthesis*, 2014, **46**, 2445.
5. L. -J. Xing, X. -M. Wang, H. -Y. Li, W. Zhou, N. Knag, P. Wang and B. Wang, *RSC Adv.*, 2014, **4**, 26783.
6. H. Li, Z. He, X. Guo, W. Li, X. Zhao and Z. Li, *Org. Lett.*, 2009, **11**, 4176.
7. T. Nash, *Biochem. J.*, 1953, **55**, 416.



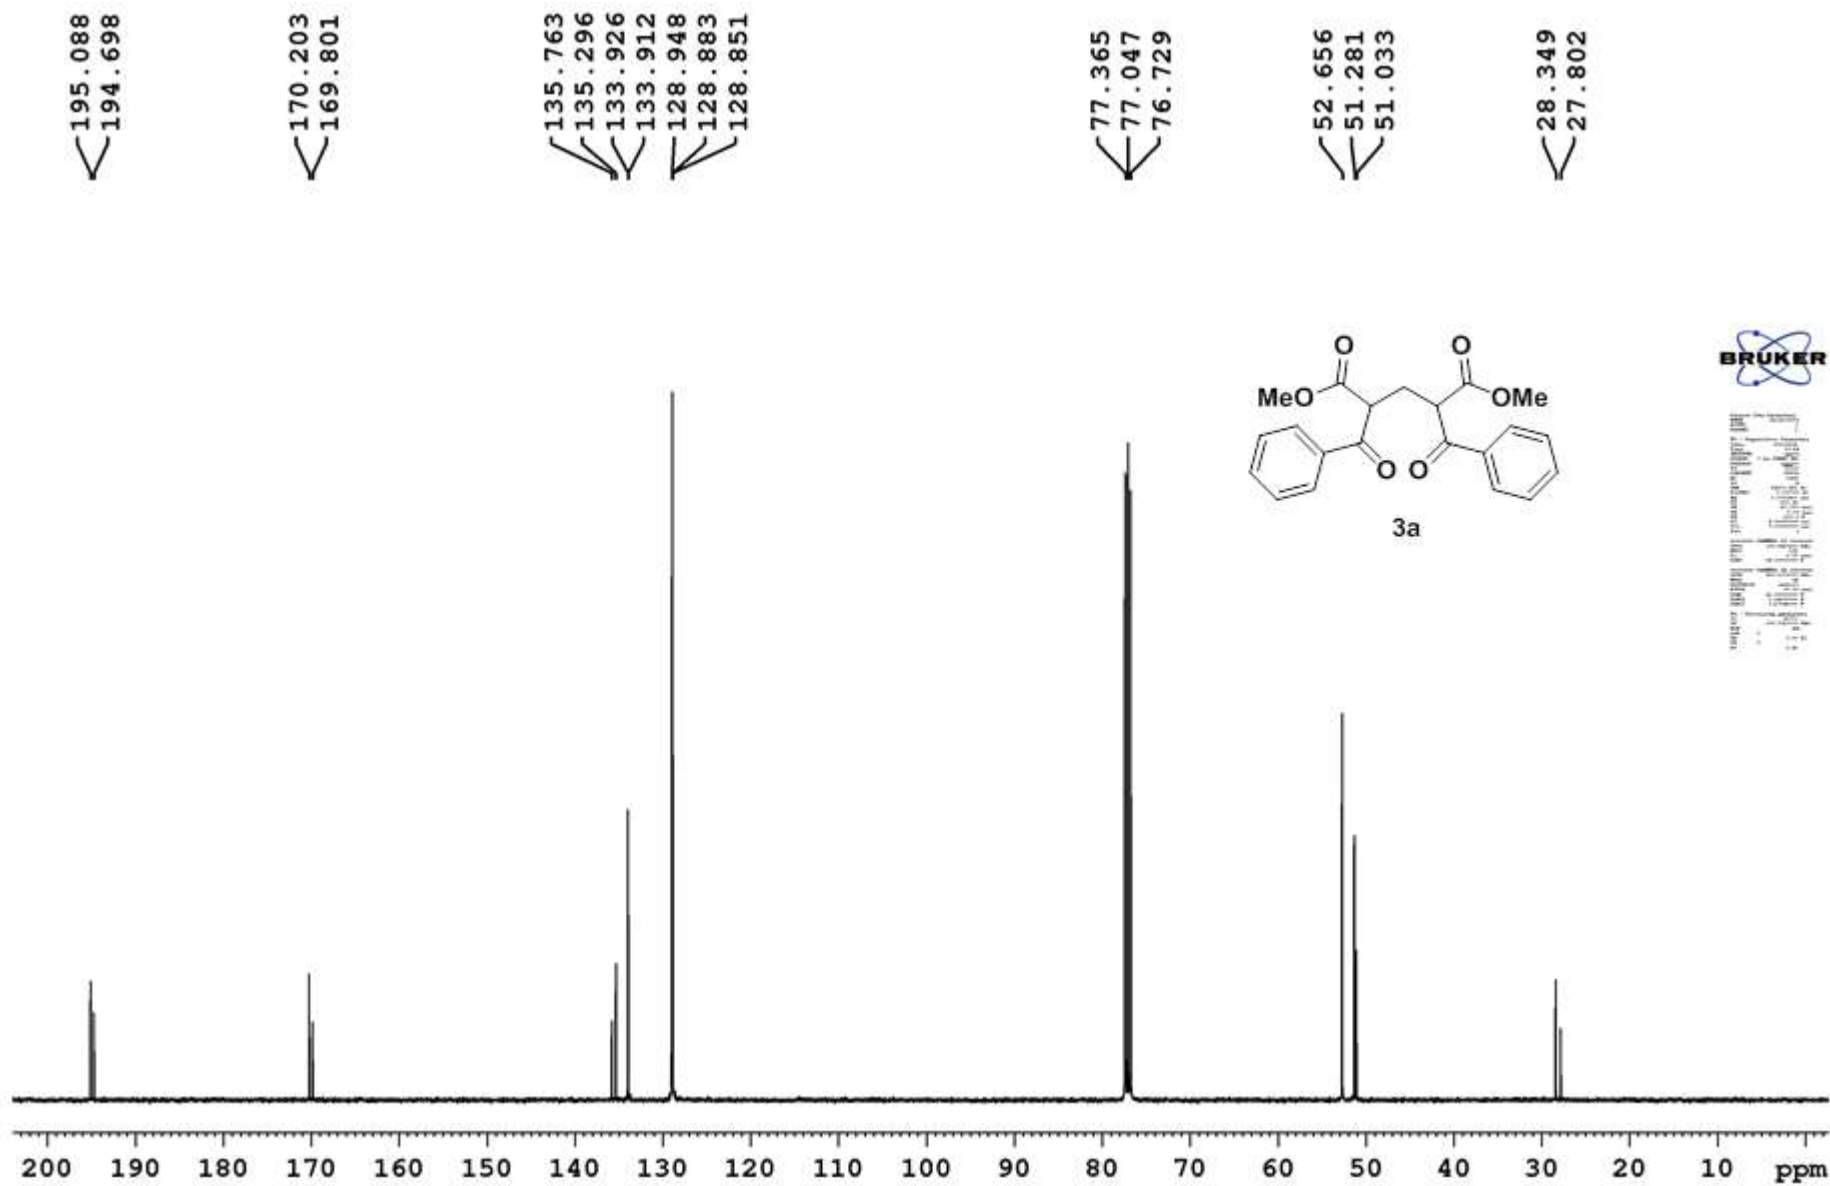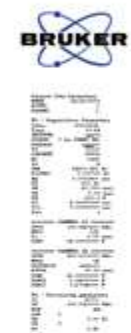



193.537  
193.086

170.102  
169.606  
167.281  
165.243

132.165  
132.143  
131.822  
131.745  
131.675  
131.601

116.179  
116.005

77.314  
77.060  
76.805

52.730  
51.186  
50.961

28.301  
27.652

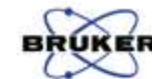

Sample: 13C NMR  
Date: 11/11/11  
Time: 10:00  
Solvent: CDCl3  
Temp: 300 K  
Pulse: zgpg30  
Acq: 13C NMR  
F2: 125.76 MHz  
SFO: 500.13 MHz  
AQ: 1.00000000  
RG: 65536  
WDW: EM  
SSB: 0  
LB: 3.00 Hz  
GB: 0  
PC: 1.00  
DC: 0.00  
SFO: 500.13 MHz  
AQ: 1.00000000  
RG: 65536  
WDW: EM  
SSB: 0  
LB: 3.00 Hz  
GB: 0  
PC: 1.00  
DC: 0.00

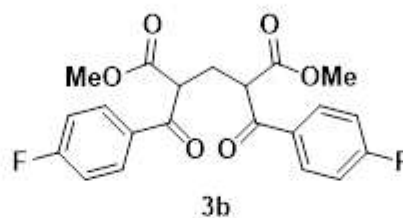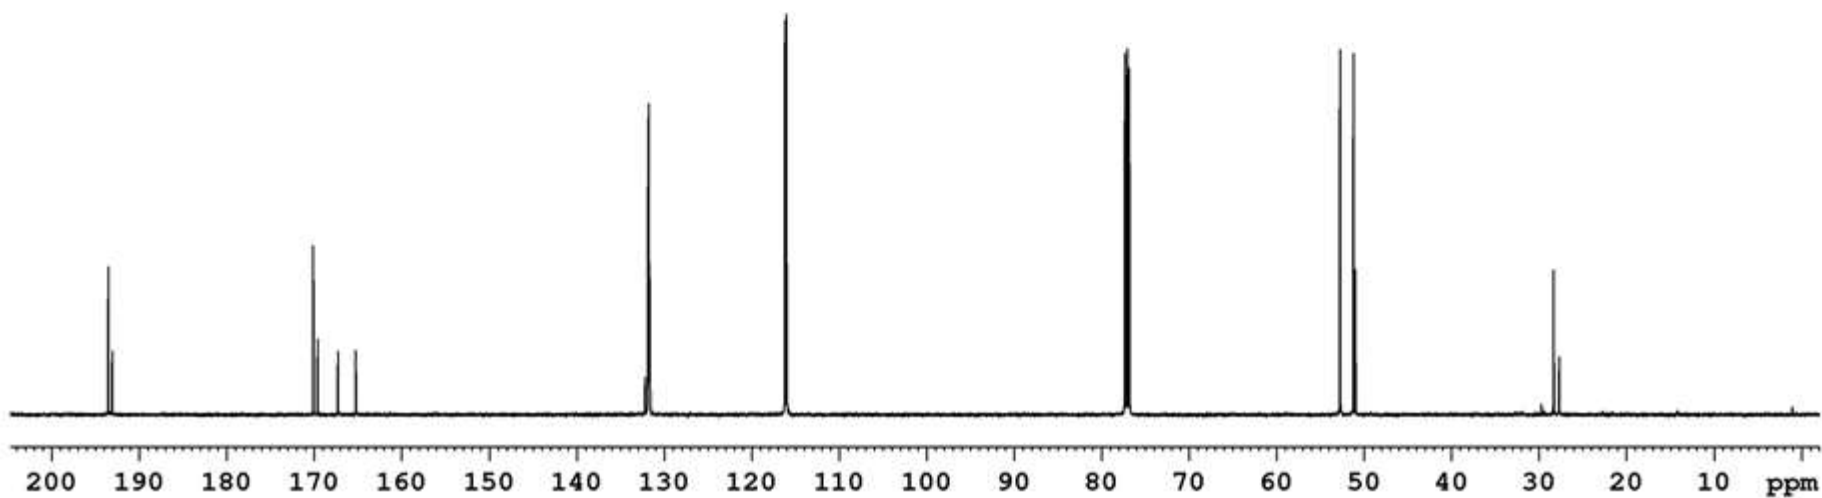

8.006  
7.990  
7.977  
7.482  
7.460  
7.443  
7.267

4.622  
4.608  
4.593  
4.526  
4.512  
4.497  
3.741  
3.636  
2.730  
2.716  
2.702  
2.688  
2.674  
2.605  
2.591  
2.576  
2.562  
2.548  
2.526  
2.512  
2.498

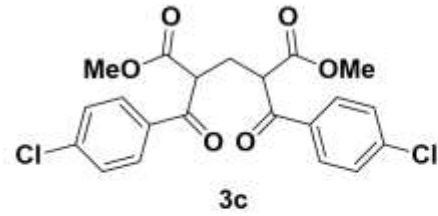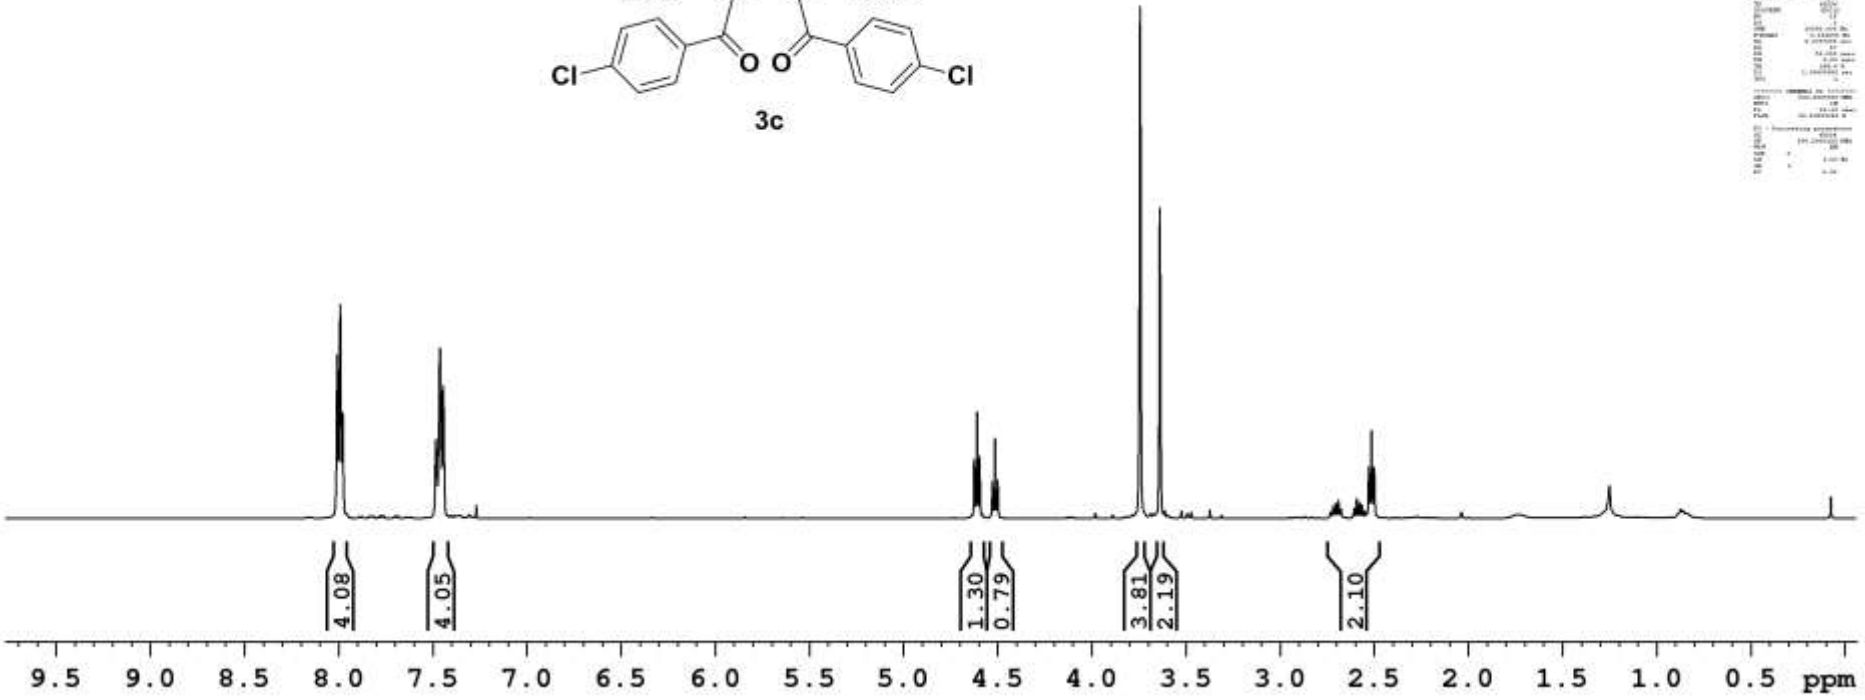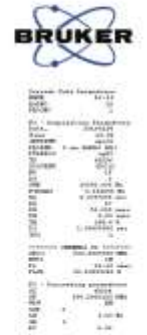



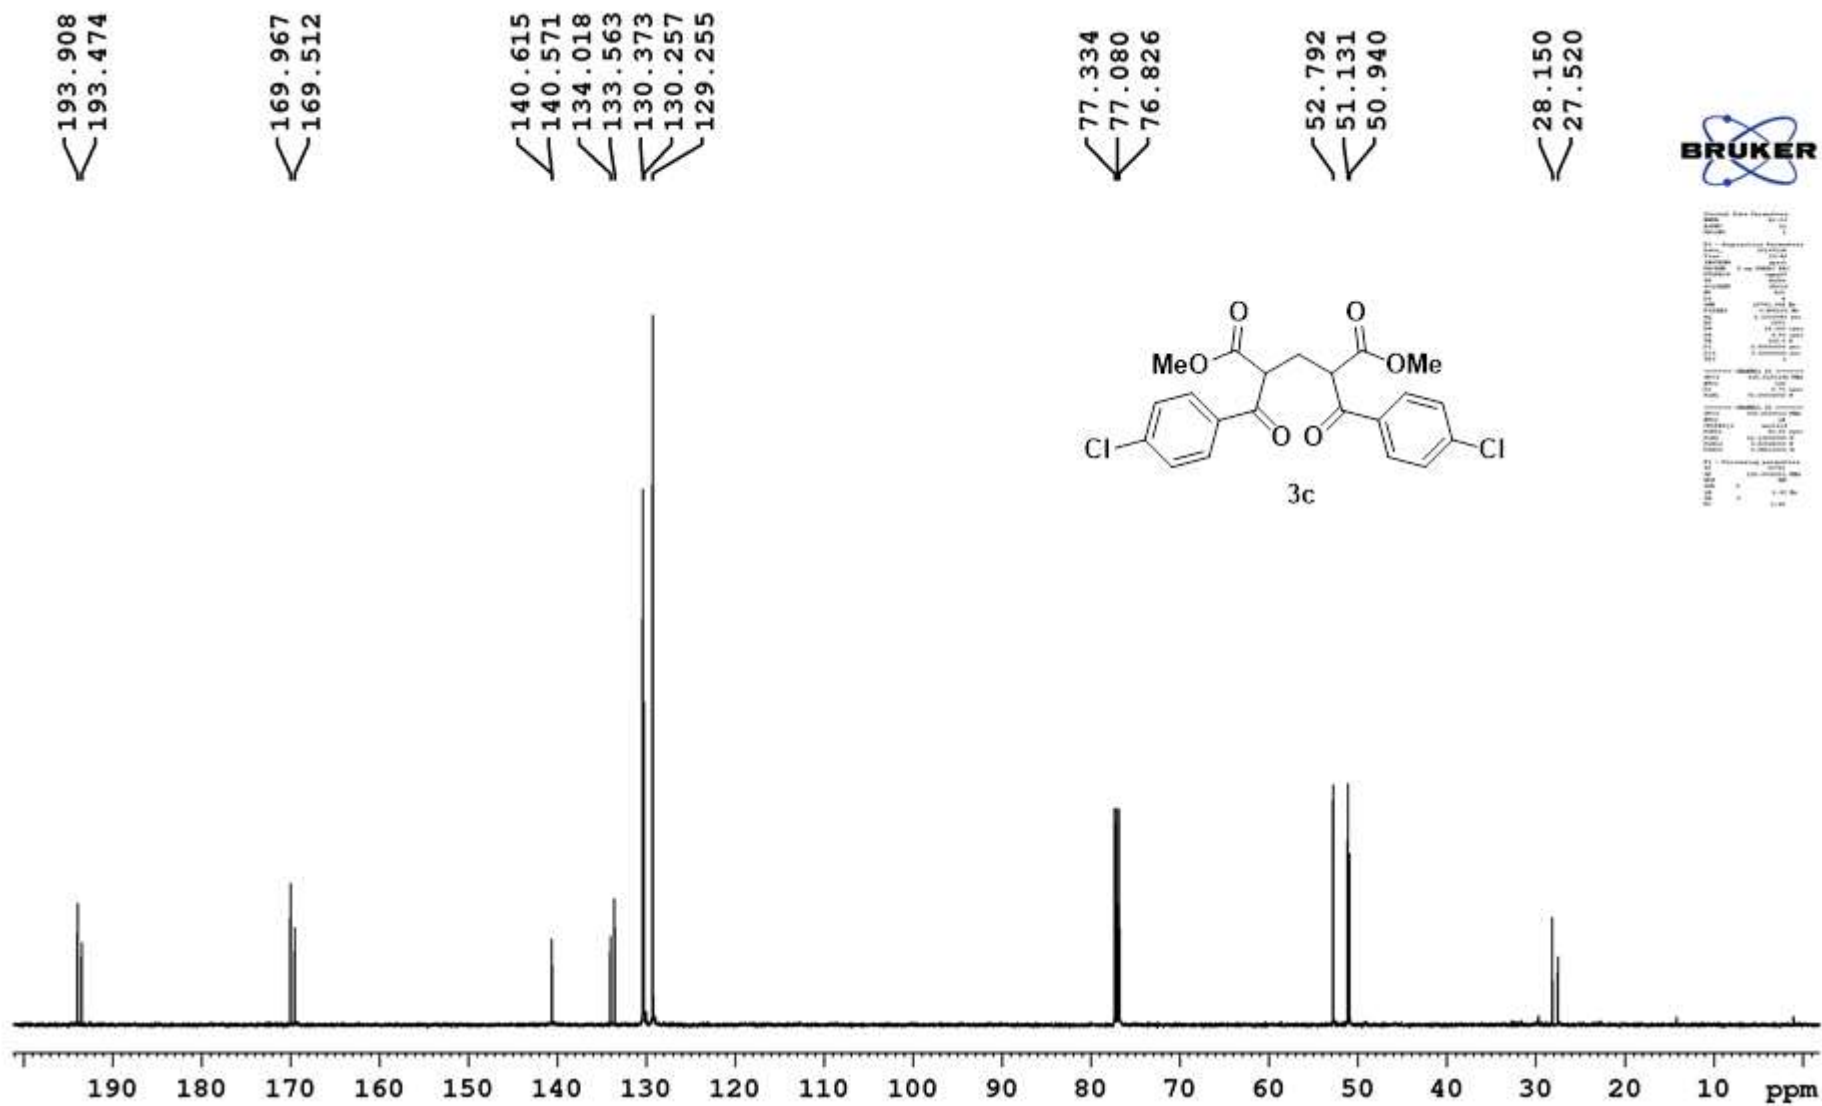



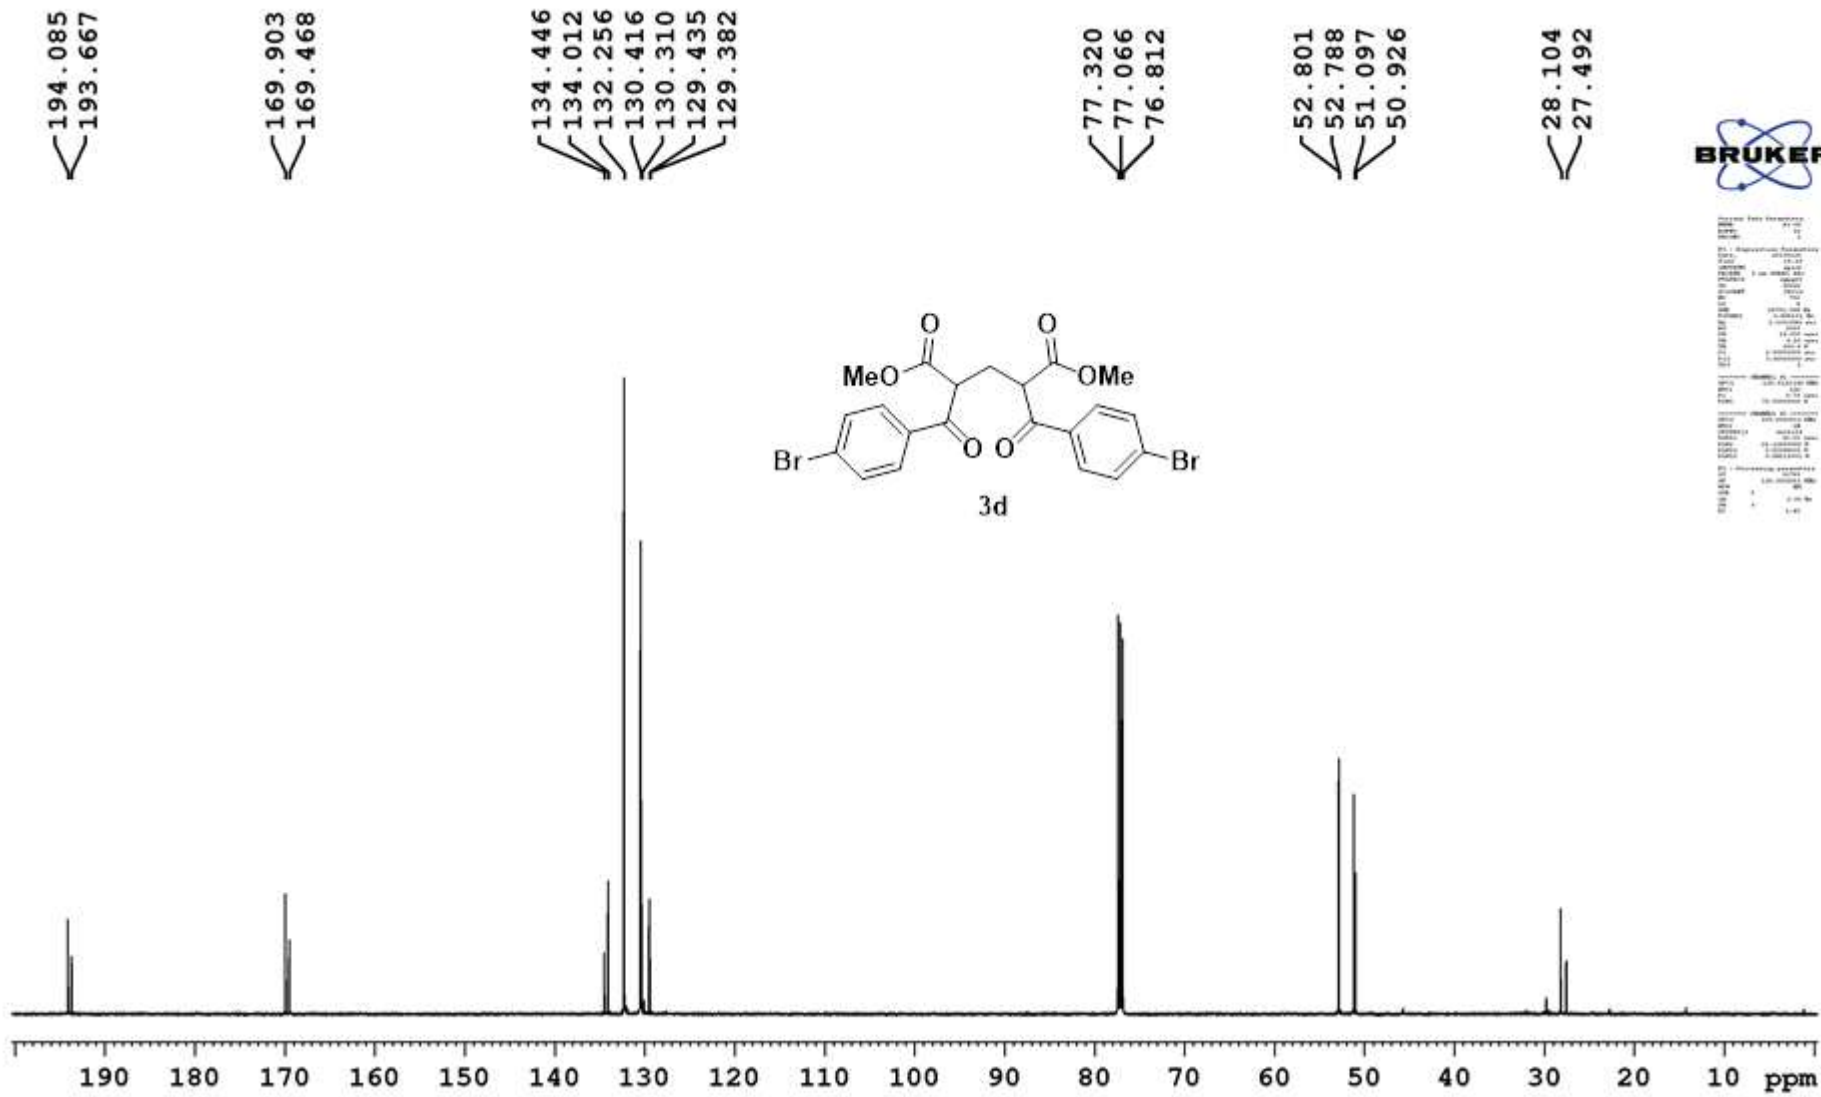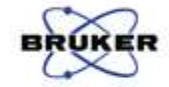

Bruker  
 13C NMR  
 125 MHz  
 CDCl3  
 25°C  
 194.085  
 193.667  
 169.903  
 169.468  
 134.446  
 134.012  
 132.256  
 130.416  
 130.310  
 129.435  
 129.382  
 77.320  
 77.066  
 76.812  
 52.801  
 52.788  
 51.097  
 50.926  
 28.104  
 27.492



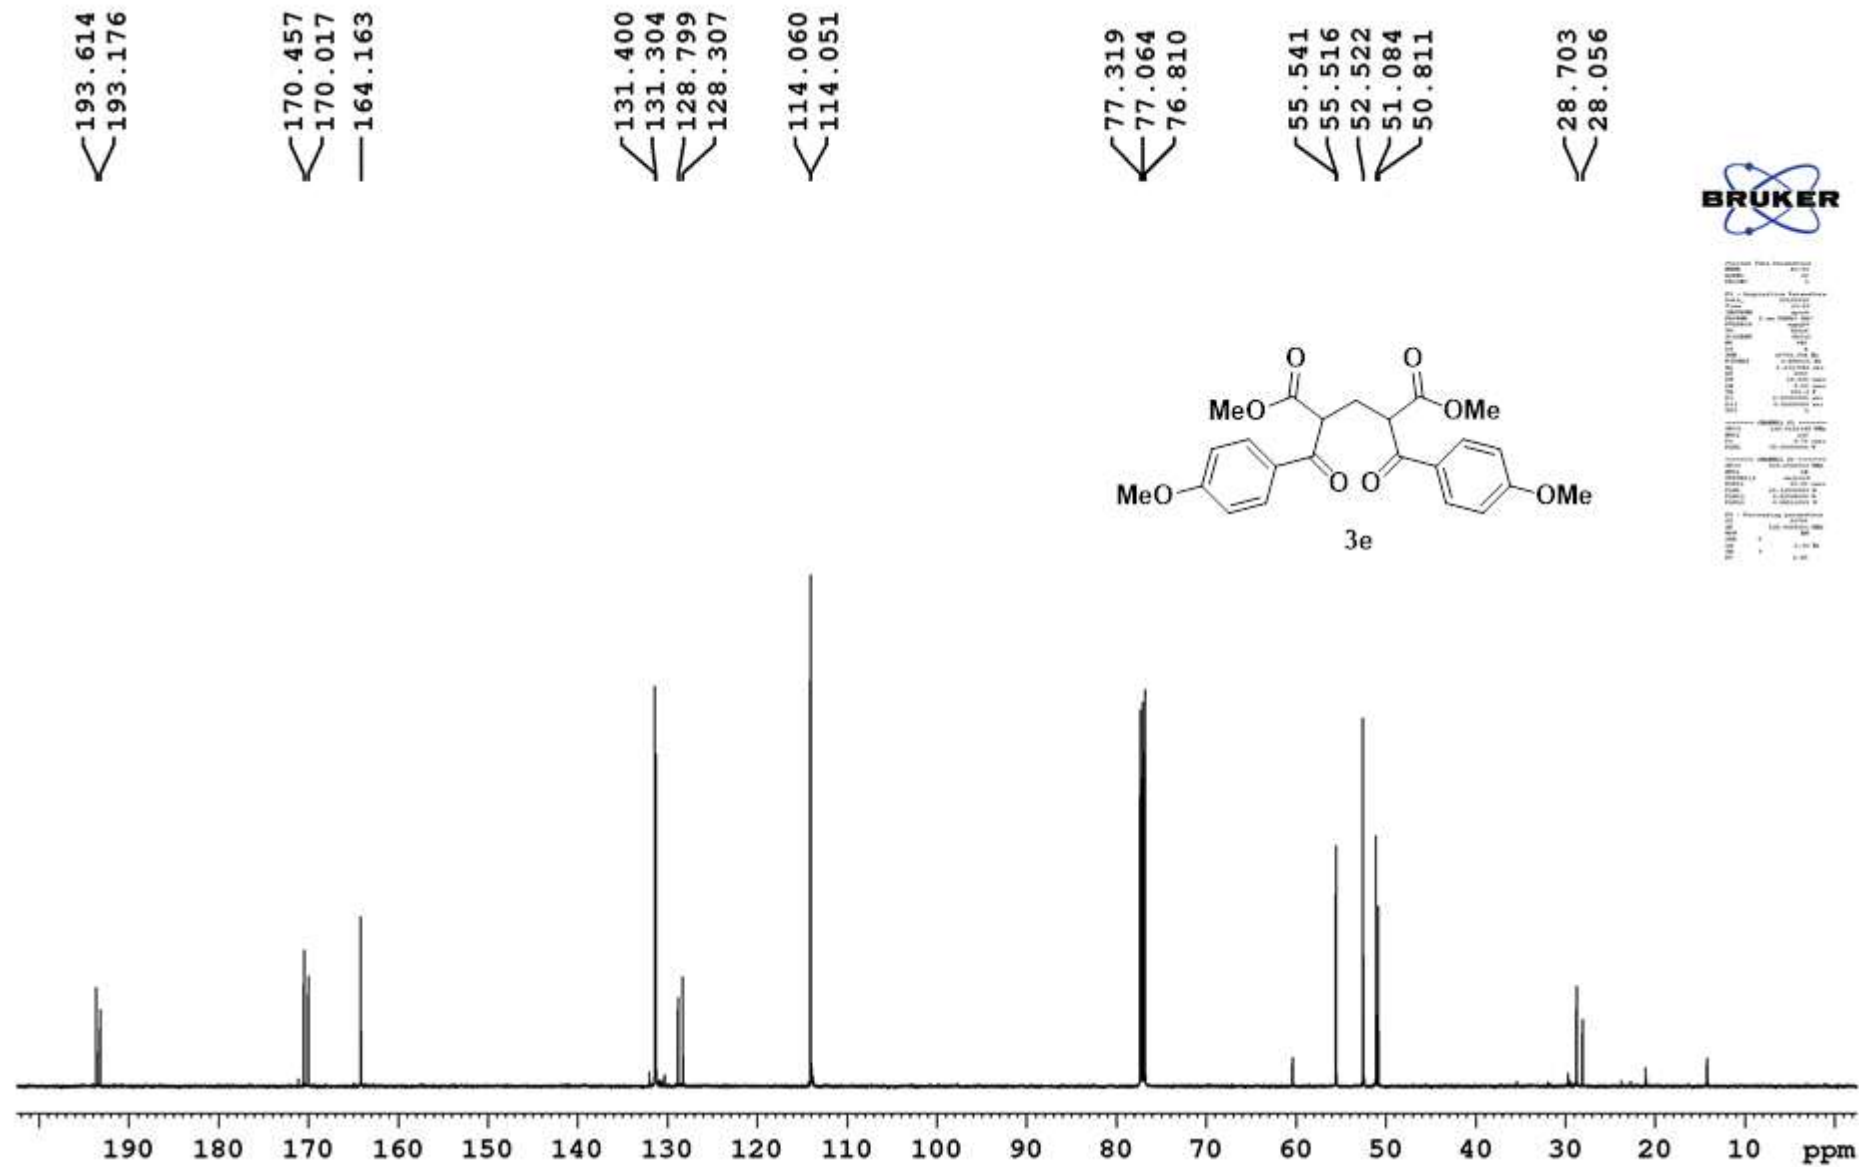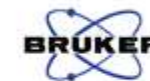

Bruker  
 13C NMR  
 125 MHz  
 CDCl3  
 25.00  
 193.614  
 193.176  
 170.457  
 170.017  
 164.163  
 131.400  
 131.304  
 128.799  
 128.307  
 114.060  
 114.051  
 77.319  
 77.064  
 76.810  
 55.541  
 55.516  
 52.522  
 51.084  
 50.811  
 28.703  
 28.056



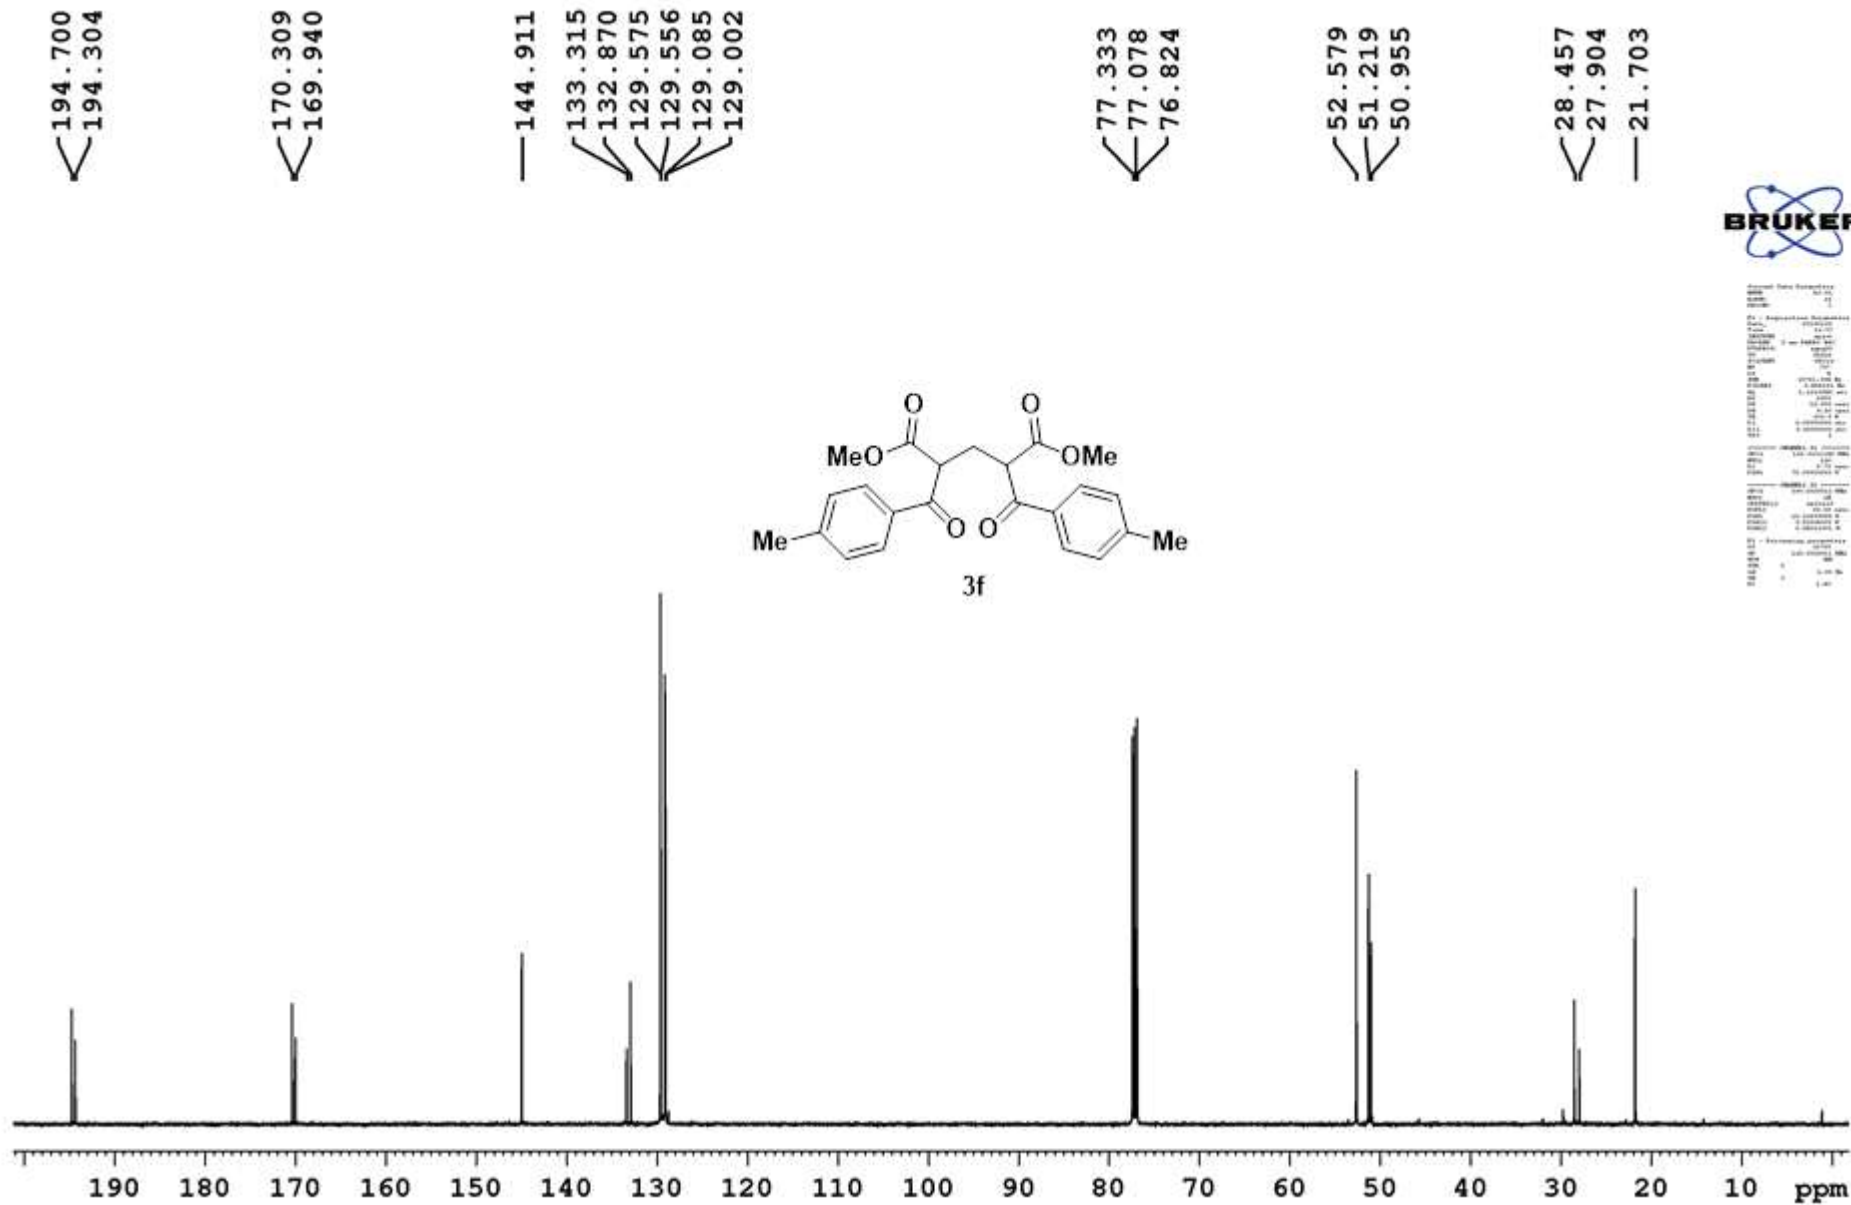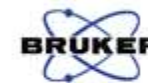

Name: 3f  
 Date: 2013-08-21  
 Time: 10:10:10  
 Sample: 3f  
 Solvent: CDCl3  
 Concentration: 10 mg/ml  
 Temperature: 300 K  
 Acquisition: 128 F2  
 Resolution: 0.39 Hz  
 F2: 101.625 MHz  
 SFO: 101.625 MHz  
 AQ: 1.00000000  
 AS: 32768  
 AV: 32768  
 DE: 0.00000000  
 EQ: 1.00000000  
 EX: 1.00000000  
 FT: 1.00000000  
 GE: 1.00000000  
 GR: 1.00000000  
 GU: 1.00000000  
 HS: 1.00000000  
 HU: 1.00000000  
 HY: 1.00000000  
 IR: 1.00000000  
 IS: 1.00000000  
 LA: 1.00000000  
 LB: 1.00000000  
 LC: 1.00000000  
 LE: 1.00000000  
 LF: 1.00000000  
 LG: 1.00000000  
 LH: 1.00000000  
 LI: 1.00000000  
 LJ: 1.00000000  
 LK: 1.00000000  
 LL: 1.00000000  
 LM: 1.00000000  
 LN: 1.00000000  
 LO: 1.00000000  
 LP: 1.00000000  
 LQ: 1.00000000  
 LR: 1.00000000  
 LS: 1.00000000  
 LT: 1.00000000  
 LU: 1.00000000  
 LV: 1.00000000  
 LW: 1.00000000  
 LX: 1.00000000  
 LY: 1.00000000  
 LZ: 1.00000000  
 MA: 1.00000000  
 MB: 1.00000000  
 MC: 1.00000000  
 MD: 1.00000000  
 ME: 1.00000000  
 MF: 1.00000000  
 MG: 1.00000000  
 MH: 1.00000000  
 MI: 1.00000000  
 MJ: 1.00000000  
 MK: 1.00000000  
 ML: 1.00000000  
 MM: 1.00000000  
 MN: 1.00000000  
 MO: 1.00000000  
 MP: 1.00000000  
 MQ: 1.00000000  
 MR: 1.00000000  
 MS: 1.00000000  
 MT: 1.00000000  
 MU: 1.00000000  
 MV: 1.00000000  
 MW: 1.00000000  
 MX: 1.00000000  
 MY: 1.00000000  
 MZ: 1.00000000  
 NA: 1.00000000  
 NB: 1.00000000  
 NC: 1.00000000  
 ND: 1.00000000  
 NE: 1.00000000  
 NF: 1.00000000  
 NG: 1.00000000  
 NH: 1.00000000  
 NI: 1.00000000  
 NJ: 1.00000000  
 NK: 1.00000000  
 NL: 1.00000000  
 NM: 1.00000000  
 NN: 1.00000000  
 NO: 1.00000000  
 NP: 1.00000000  
 NQ: 1.00000000  
 NR: 1.00000000  
 NS: 1.00000000  
 NT: 1.00000000  
 NU: 1.00000000  
 NV: 1.00000000  
 NW: 1.00000000  
 NX: 1.00000000  
 NY: 1.00000000  
 NZ: 1.00000000  
 OA: 1.00000000  
 OB: 1.00000000  
 OC: 1.00000000  
 OD: 1.00000000  
 OE: 1.00000000  
 OF: 1.00000000  
 OG: 1.00000000  
 OH: 1.00000000  
 OI: 1.00000000  
 OJ: 1.00000000  
 OK: 1.00000000  
 OL: 1.00000000  
 OM: 1.00000000  
 ON: 1.00000000  
 OO: 1.00000000  
 OP: 1.00000000  
 OQ: 1.00000000  
 OR: 1.00000000  
 OS: 1.00000000  
 OT: 1.00000000  
 OU: 1.00000000  
 OV: 1.00000000  
 OW: 1.00000000  
 OX: 1.00000000  
 OY: 1.00000000  
 OZ: 1.00000000  
 PA: 1.00000000  
 PB: 1.00000000  
 PC: 1.00000000  
 PD: 1.00000000  
 PE: 1.00000000  
 PF: 1.00000000  
 PG: 1.00000000  
 PH: 1.00000000  
 PI: 1.00000000  
 PJ: 1.00000000  
 PK: 1.00000000  
 PL: 1.00000000  
 PM: 1.00000000  
 PN: 1.00000000  
 PO: 1.00000000  
 PP: 1.00000000  
 PQ: 1.00000000  
 PR: 1.00000000  
 PS: 1.00000000  
 PT: 1.00000000  
 PU: 1.00000000  
 PV: 1.00000000  
 PW: 1.00000000  
 PX: 1.00000000  
 PY: 1.00000000  
 PZ: 1.00000000  
 QA: 1.00000000  
 QB: 1.00000000  
 QC: 1.00000000  
 QD: 1.00000000  
 QE: 1.00000000  
 QF: 1.00000000  
 QG: 1.00000000  
 QH: 1.00000000  
 QI: 1.00000000  
 QJ: 1.00000000  
 QK: 1.00000000  
 QL: 1.00000000  
 QM: 1.00000000  
 QN: 1.00000000  
 QO: 1.00000000  
 QP: 1.00000000  
 QQ: 1.00000000  
 QR: 1.00000000  
 QS: 1.00000000  
 QT: 1.00000000  
 QU: 1.00000000  
 QV: 1.00000000  
 QW: 1.00000000  
 QX: 1.00000000  
 QY: 1.00000000  
 QZ: 1.00000000  
 RA: 1.00000000  
 RB: 1.00000000  
 RC: 1.00000000  
 RD: 1.00000000  
 RE: 1.00000000  
 RF: 1.00000000  
 RG: 1.00000000  
 RH: 1.00000000  
 RI: 1.00000000  
 RJ: 1.00000000  
 RK: 1.00000000  
 RL: 1.00000000  
 RM: 1.00000000  
 RN: 1.00000000  
 RO: 1.00000000  
 RP: 1.00000000  
 RQ: 1.00000000  
 RR: 1.00000000  
 RS: 1.00000000  
 RT: 1.00000000  
 RU: 1.00000000  
 RV: 1.00000000  
 RW: 1.00000000  
 RX: 1.00000000  
 RY: 1.00000000  
 RZ: 1.00000000  
 SA: 1.00000000  
 SB: 1.00000000  
 SC: 1.00000000  
 SD: 1.00000000  
 SE: 1.00000000  
 SF: 1.00000000  
 SG: 1.00000000  
 SH: 1.00000000  
 SI: 1.00000000  
 SJ: 1.00000000  
 SK: 1.00000000  
 SL: 1.00000000  
 SM: 1.00000000  
 SN: 1.00000000  
 SO: 1.00000000  
 SP: 1.00000000  
 SQ: 1.00000000  
 SR: 1.00000000  
 SS: 1.00000000  
 ST: 1.00000000  
 SU: 1.00000000  
 SV: 1.00000000  
 SW: 1.00000000  
 SX: 1.00000000  
 SY: 1.00000000  
 SZ: 1.00000000  
 TA: 1.00000000  
 TB: 1.00000000  
 TC: 1.00000000  
 TD: 1.00000000  
 TE: 1.00000000  
 TF: 1.00000000  
 TG: 1.00000000  
 TH: 1.00000000  
 TI: 1.00000000  
 TJ: 1.00000000  
 TK: 1.00000000  
 TL: 1.00000000  
 TM: 1.00000000  
 TN: 1.00000000  
 TO: 1.00000000  
 TP: 1.00000000  
 TQ: 1.00000000  
 TR: 1.00000000  
 TS: 1.00000000  
 TT: 1.00000000  
 TU: 1.00000000  
 TV: 1.00000000  
 TW: 1.00000000  
 TX: 1.00000000  
 TY: 1.00000000  
 TZ: 1.00000000  
 UA: 1.00000000  
 UB: 1.00000000  
 UC: 1.00000000  
 UD: 1.00000000  
 UE: 1.00000000  
 UF: 1.00000000  
 UG: 1.00000000  
 UH: 1.00000000  
 UI: 1.00000000  
 UJ: 1.00000000  
 UK: 1.00000000  
 UL: 1.00000000  
 UM: 1.00000000  
 UN: 1.00000000  
 UO: 1.00000000  
 UP: 1.00000000  
 UQ: 1.00000000  
 UR: 1.00000000  
 US: 1.00000000  
 UT: 1.00000000  
 UY: 1.00000000  
 UZ: 1.00000000  
 VA: 1.00000000  
 VB: 1.00000000  
 VC: 1.00000000  
 VD: 1.00000000  
 VE: 1.00000000  
 VF: 1.00000000  
 VG: 1.00000000  
 VH: 1.00000000  
 VI: 1.00000000  
 VJ: 1.00000000  
 VK: 1.00000000  
 VL: 1.00000000  
 VM: 1.00000000  
 VN: 1.00000000  
 VO: 1.00000000  
 VP: 1.00000000  
 VQ: 1.00000000  
 VR: 1.00000000  
 VS: 1.00000000  
 VT: 1.00000000  
 VU: 1.00000000  
 VV: 1.00000000  
 VW: 1.00000000  
 VX: 1.00000000  
 VY: 1.00000000  
 VZ: 1.00000000  
 WA: 1.00000000  
 WB: 1.00000000  
 WC: 1.00000000  
 WD: 1.00000000  
 WE: 1.00000000  
 WF: 1.00000000  
 WG: 1.00000000  
 WH: 1.00000000  
 WI: 1.00000000  
 WJ: 1.00000000  
 WK: 1.00000000  
 WL: 1.00000000  
 WM: 1.00000000  
 WN: 1.00000000  
 WO: 1.00000000  
 WP: 1.00000000  
 WQ: 1.00000000  
 WR: 1.00000000  
 WS: 1.00000000  
 WT: 1.00000000  
 WU: 1.00000000  
 WV: 1.00000000  
 WW: 1.00000000  
 WX: 1.00000000  
 WY: 1.00000000  
 WZ: 1.00000000  
 XA: 1.00000000  
 XB: 1.00000000  
 XC: 1.00000000  
 XD: 1.00000000  
 XE: 1.00000000  
 XF: 1.00000000  
 XG: 1.00000000  
 XH: 1.00000000  
 XI: 1.00000000  
 XJ: 1.00000000  
 XK: 1.00000000  
 XL: 1.00000000  
 XM: 1.00000000  
 XN: 1.00000000  
 XO: 1.00000000  
 XP: 1.00000000  
 XQ: 1.00000000  
 XR: 1.00000000  
 XS: 1.00000000  
 XT: 1.00000000  
 XU: 1.00000000  
 XV: 1.00000000  
 XW: 1.00000000  
 XX: 1.00000000  
 XY: 1.00000000  
 XZ: 1.00000000  
 YA: 1.00000000  
 YB: 1.00000000  
 YC: 1.00000000  
 YD: 1.00000000  
 YE: 1.00000000  
 YF: 1.00000000  
 YG: 1.00000000  
 YH: 1.00000000  
 YI: 1.00000000  
 YJ: 1.00000000  
 YK: 1.00000000  
 YL: 1.00000000  
 YM: 1.00000000  
 YN: 1.00000000  
 YO: 1.00000000  
 YP: 1.00000000  
 YQ: 1.00000000  
 YR: 1.00000000  
 YS: 1.00000000  
 YT: 1.00000000  
 YU: 1.00000000  
 YV: 1.00000000  
 YW: 1.00000000  
 YX: 1.00000000  
 YZ: 1.00000000  
 ZA: 1.00000000  
 ZB: 1.00000000  
 ZC: 1.00000000  
 ZD: 1.00000000  
 ZE: 1.00000000  
 ZF: 1.00000000  
 ZG: 1.00000000  
 ZH: 1.00000000  
 ZI: 1.00000000  
 ZJ: 1.00000000  
 ZK: 1.00000000  
 ZL: 1.00000000  
 ZM: 1.00000000  
 ZN: 1.00000000  
 ZO: 1.00000000  
 ZP: 1.00000000  
 ZQ: 1.00000000  
 ZR: 1.00000000  
 ZS: 1.00000000  
 ZT: 1.00000000  
 ZU: 1.00000000  
 ZV: 1.00000000  
 ZW: 1.00000000  
 ZX: 1.00000000  
 ZY: 1.00000000  
 ZZ: 1.00000000





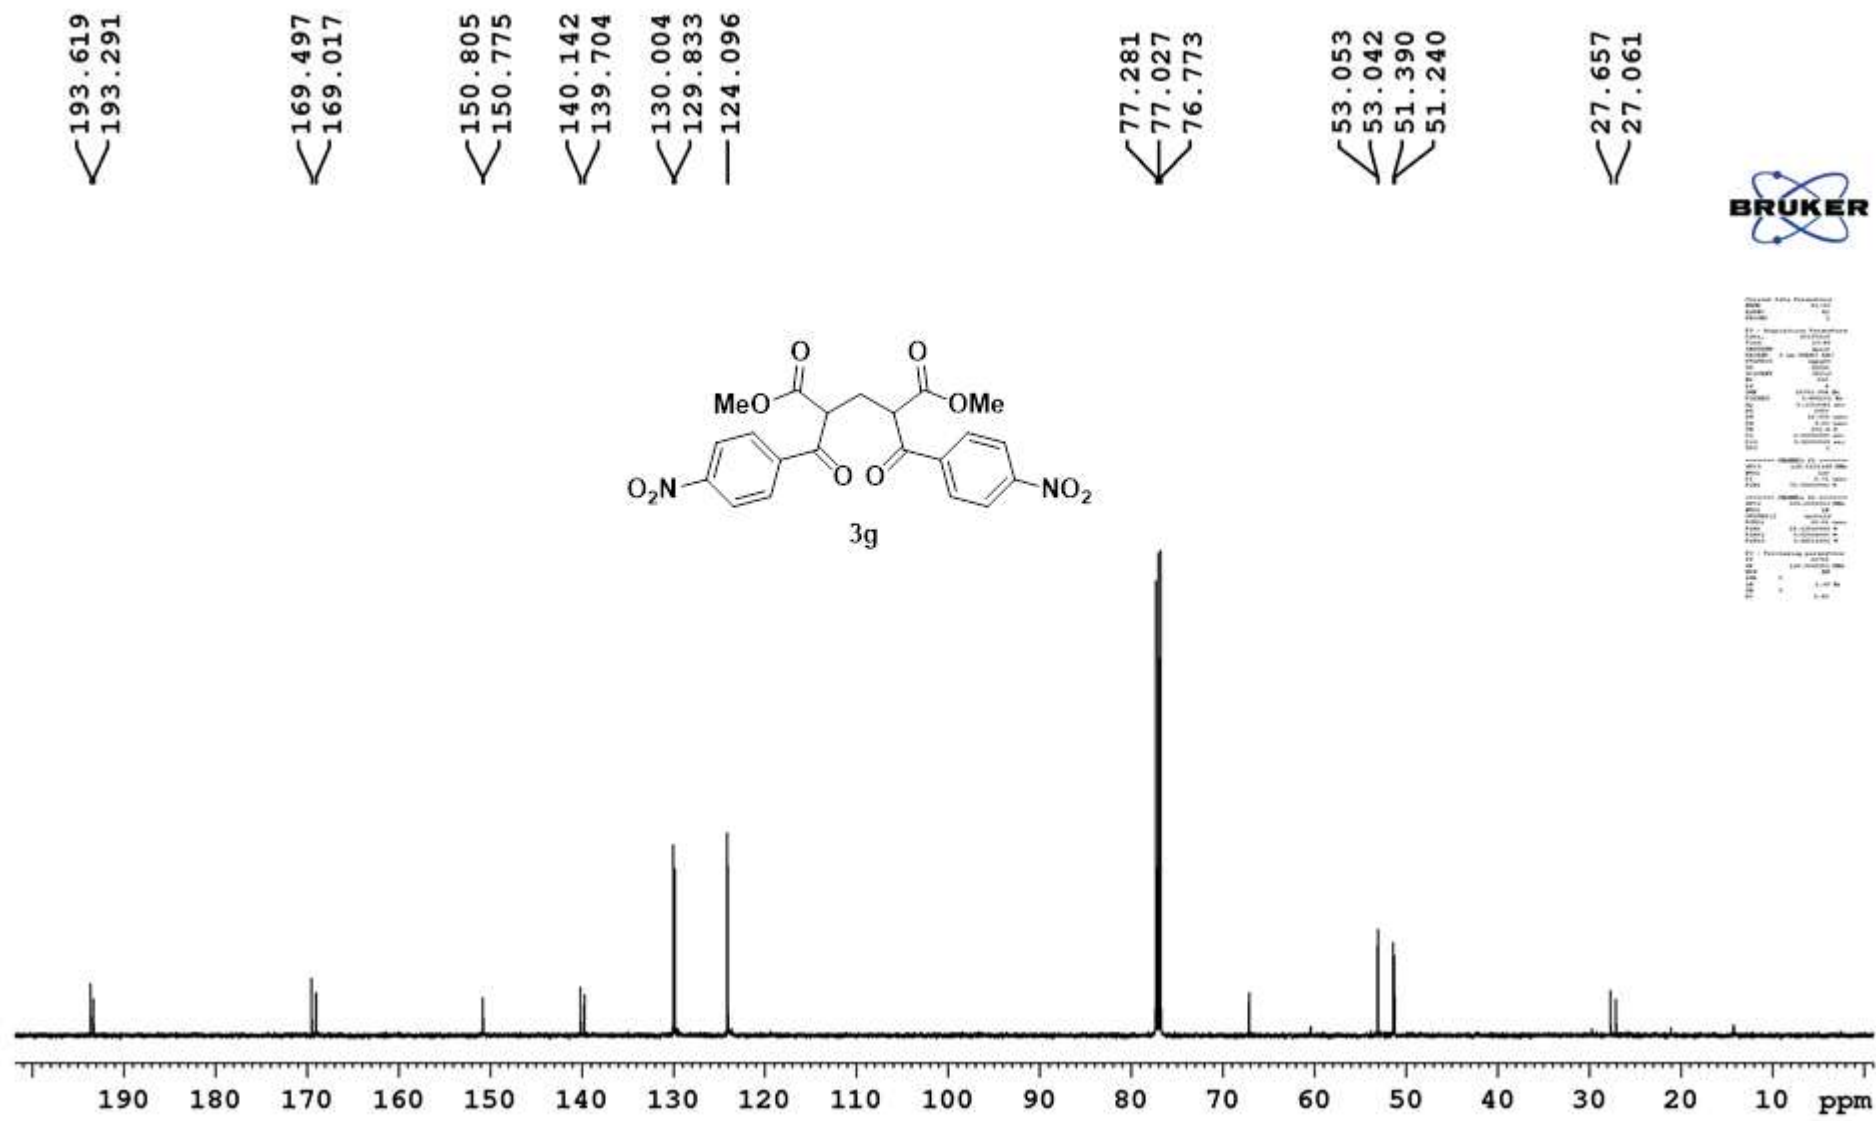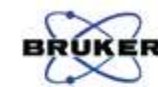

Name: 3g  
 Date: 11/11/2011  
 Time: 10:14  
 Sample: 3g  
 Solvent: CDCl3  
 Concentration: 10 mg/ml  
 Acquisition: 128 F2  
 Processing: 128 F2  
 Reference: TMS  
 Scale: 1000000  
 Gain: 1000000  
 Resolution: 0.390625  
 FWHM: 0.390625  
 S/N: 1000000  
 Integration: 1.000000  
 Baseline: 0.000000  
 Phase: 0.000000  
 Frequency: 101.625000  
 Temperature: 300.2 K  
 Pressure: 1.01325 bar  
 Humidity: 0.000000  
 Acquisition Time: 0.000000  
 Processing Time: 0.000000  
 Total Time: 0.000000



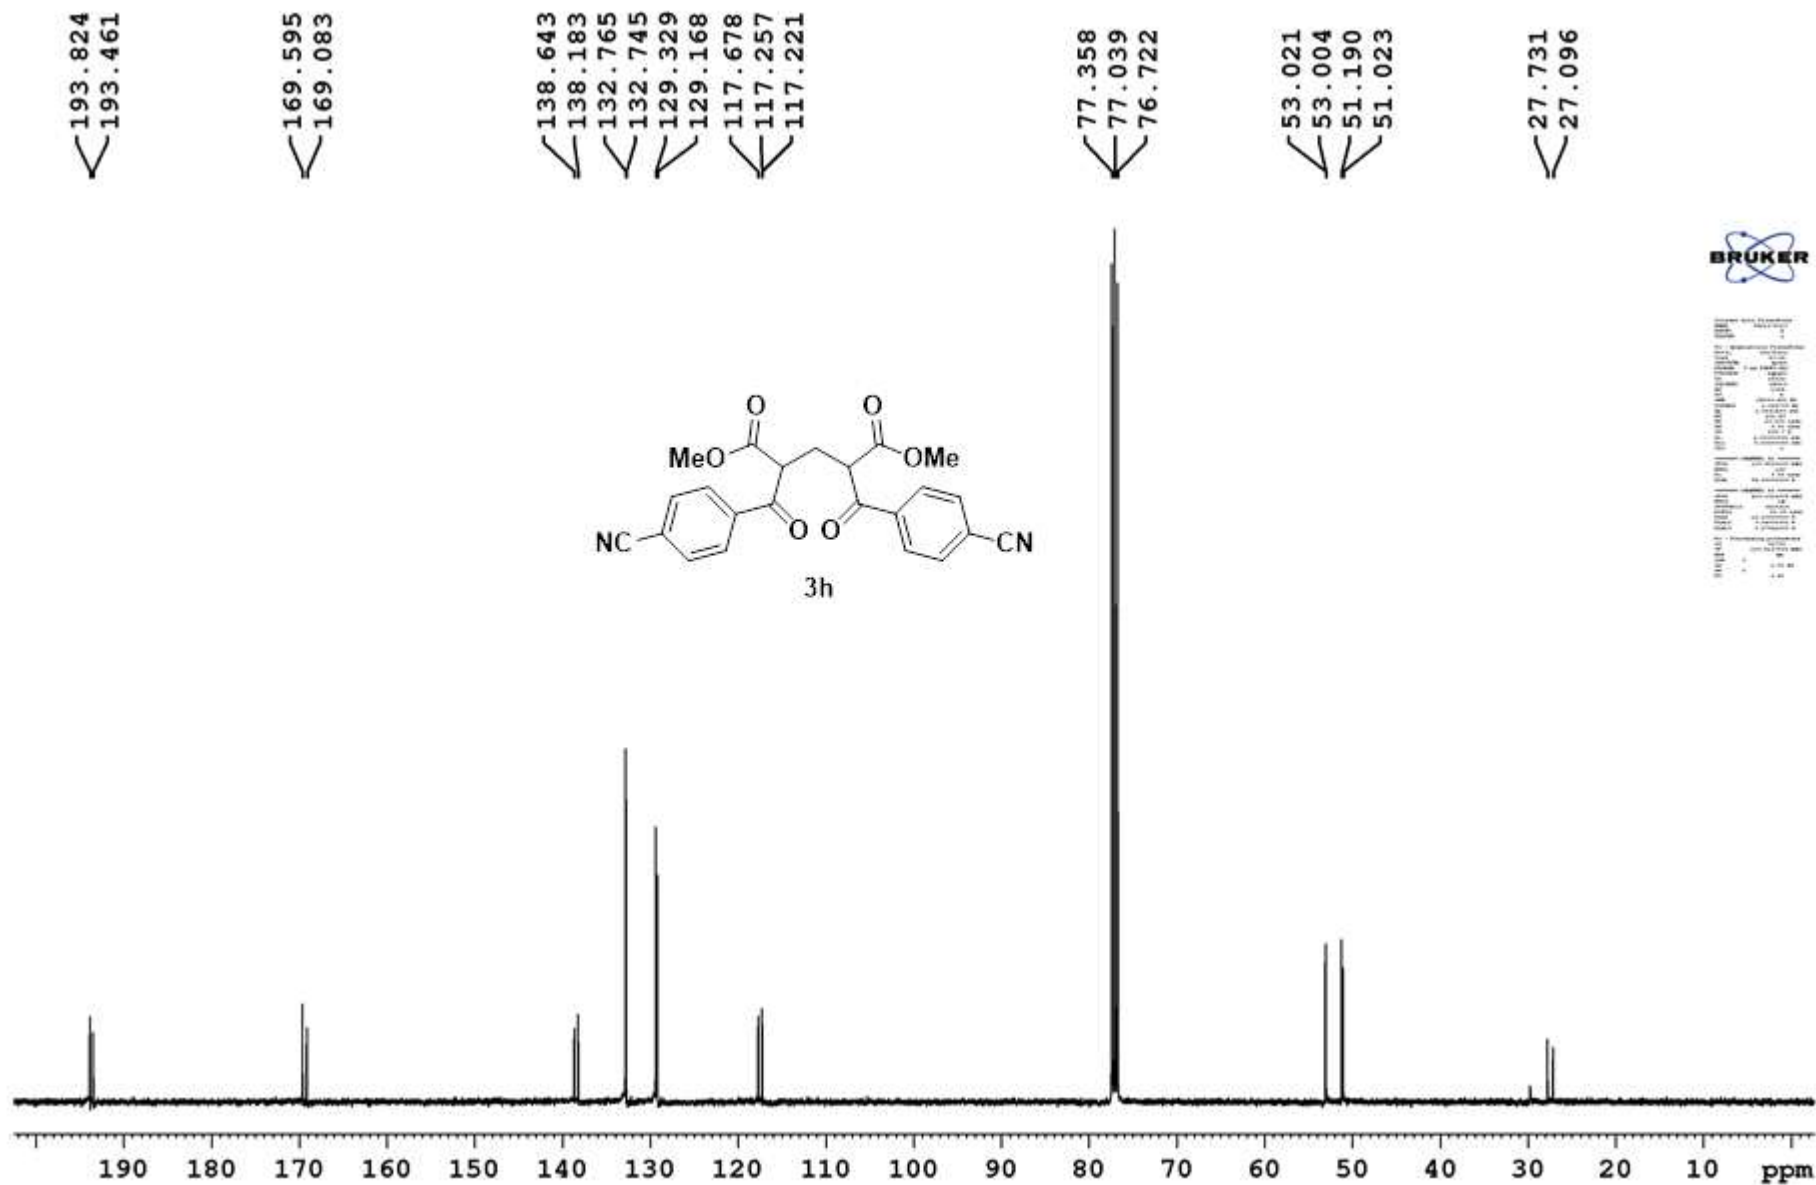



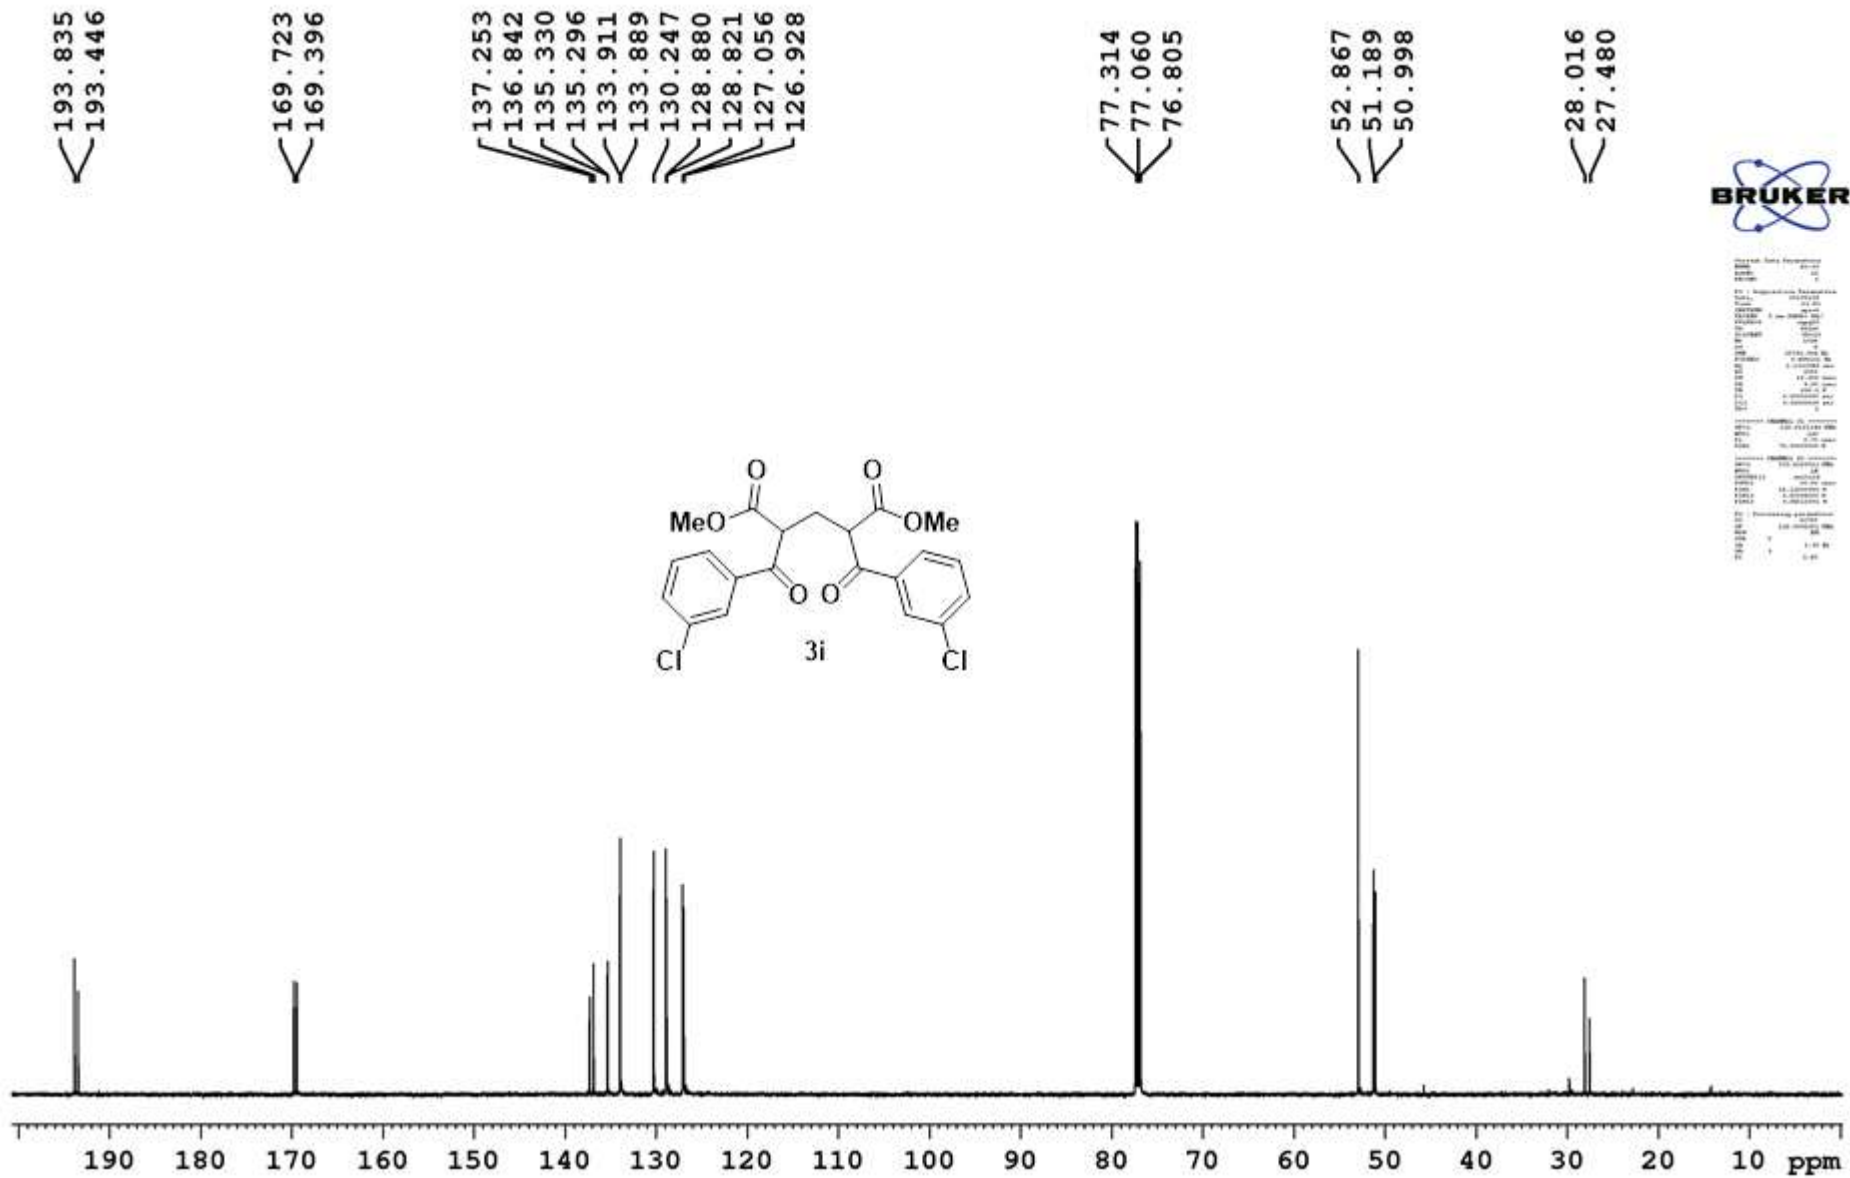













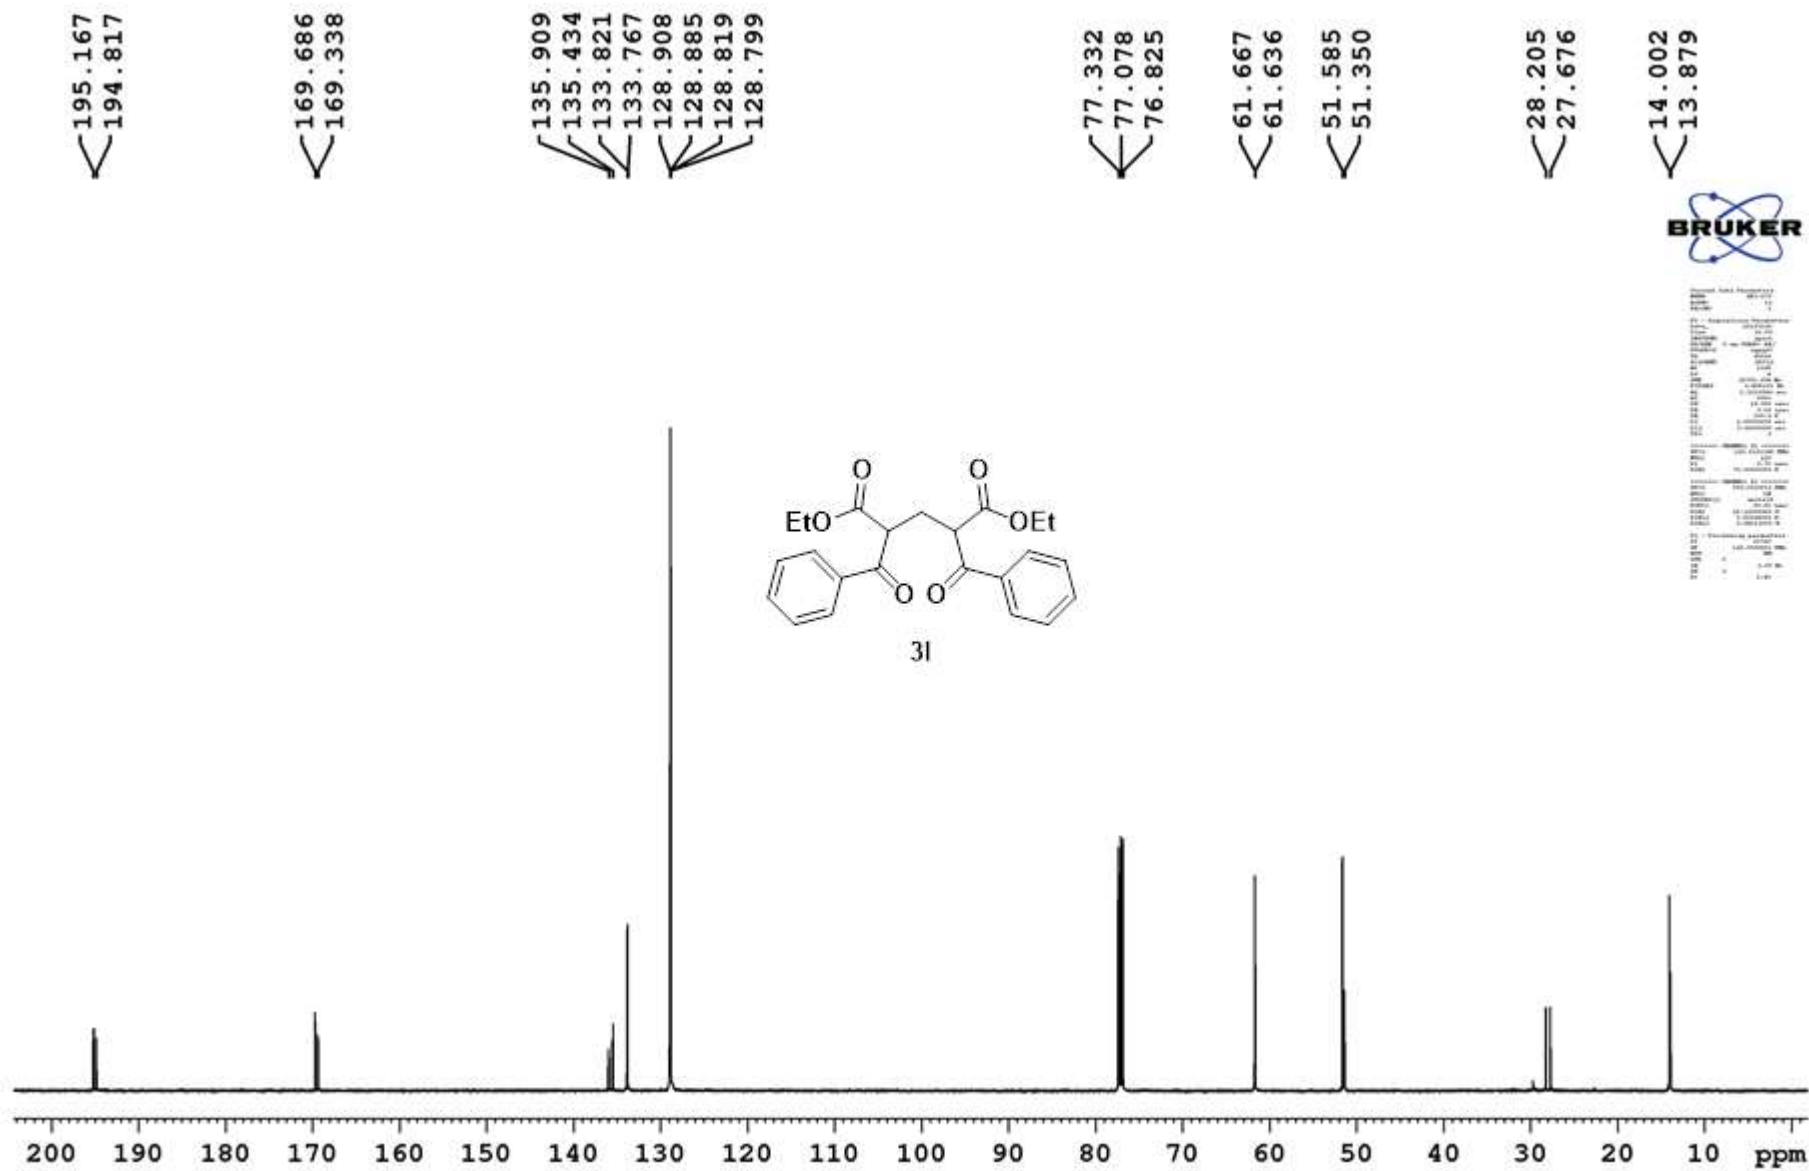







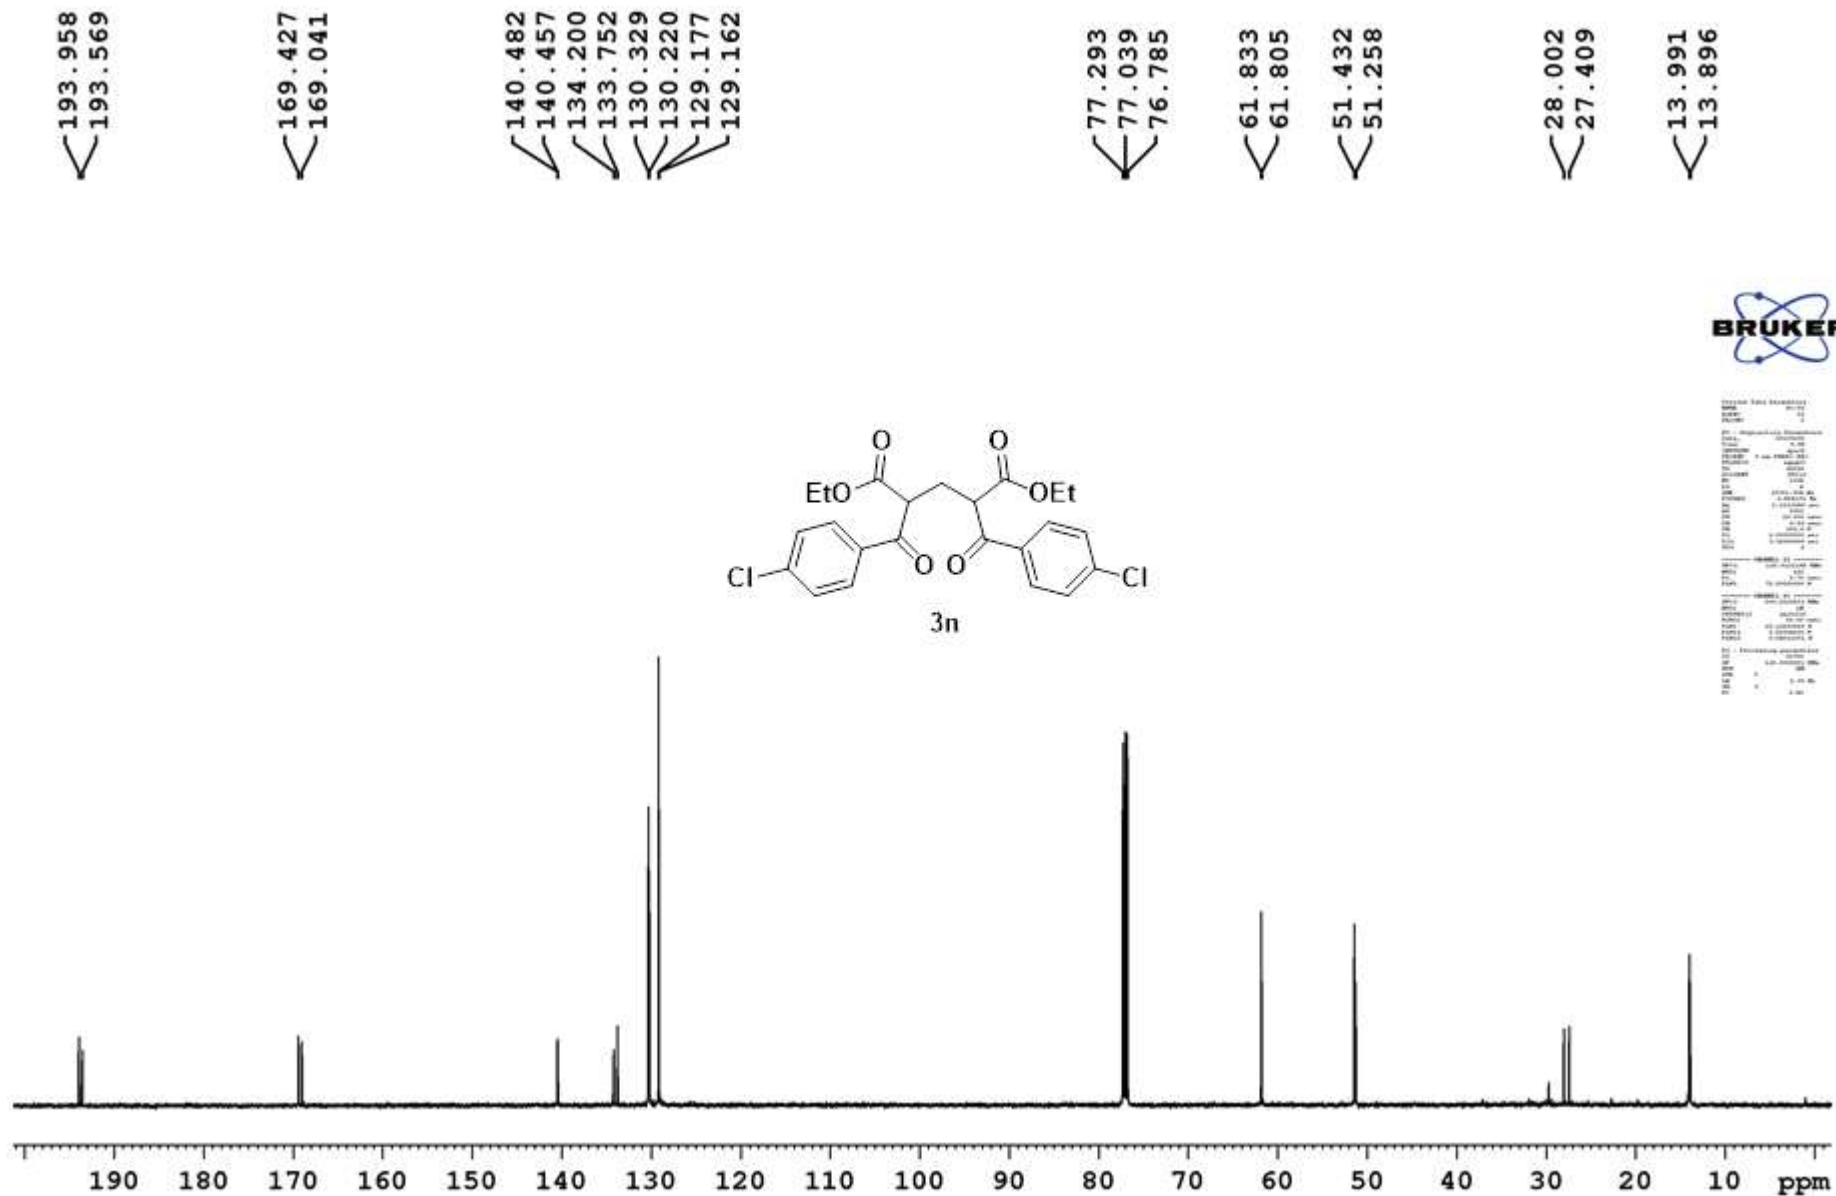

7.915  
7.899  
7.650  
7.633  
7.625  
7.608  
7.269

4.566  
4.551  
4.537  
4.482  
4.467  
4.453  
4.247  
4.225  
4.211  
4.204  
4.189  
4.168  
4.114  
4.100  
4.089  
2.729  
2.714  
2.700  
2.686  
2.672  
2.592  
2.577  
2.563  
2.549  
2.531  
2.516  
2.502  
1.228  
1.214  
1.200  
1.136  
1.121  
1.107

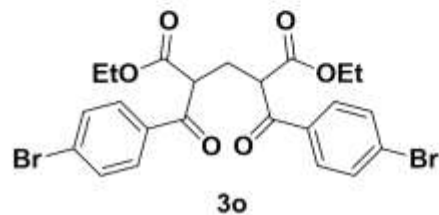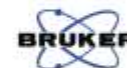

BRUKER  
 Name: 3o  
 Date: 2017-07-17  
 Time: 10:10:10  
 File: 3o\_170717\_101010.f2  
 F2 - Acquisition Parameters  
 Name: 3o\_170717\_101010  
 Date\_Time: 20170717 10:10:10  
 File: 3o\_170717\_101010.f2  
 F2 - Processing parameters  
 Name: 3o\_170717\_101010  
 Date\_Time: 20170717 10:10:10  
 File: 3o\_170717\_101010.f2  
 F2 - Reference parameters  
 Name: 3o\_170717\_101010  
 Date\_Time: 20170717 10:10:10  
 File: 3o\_170717\_101010.f2

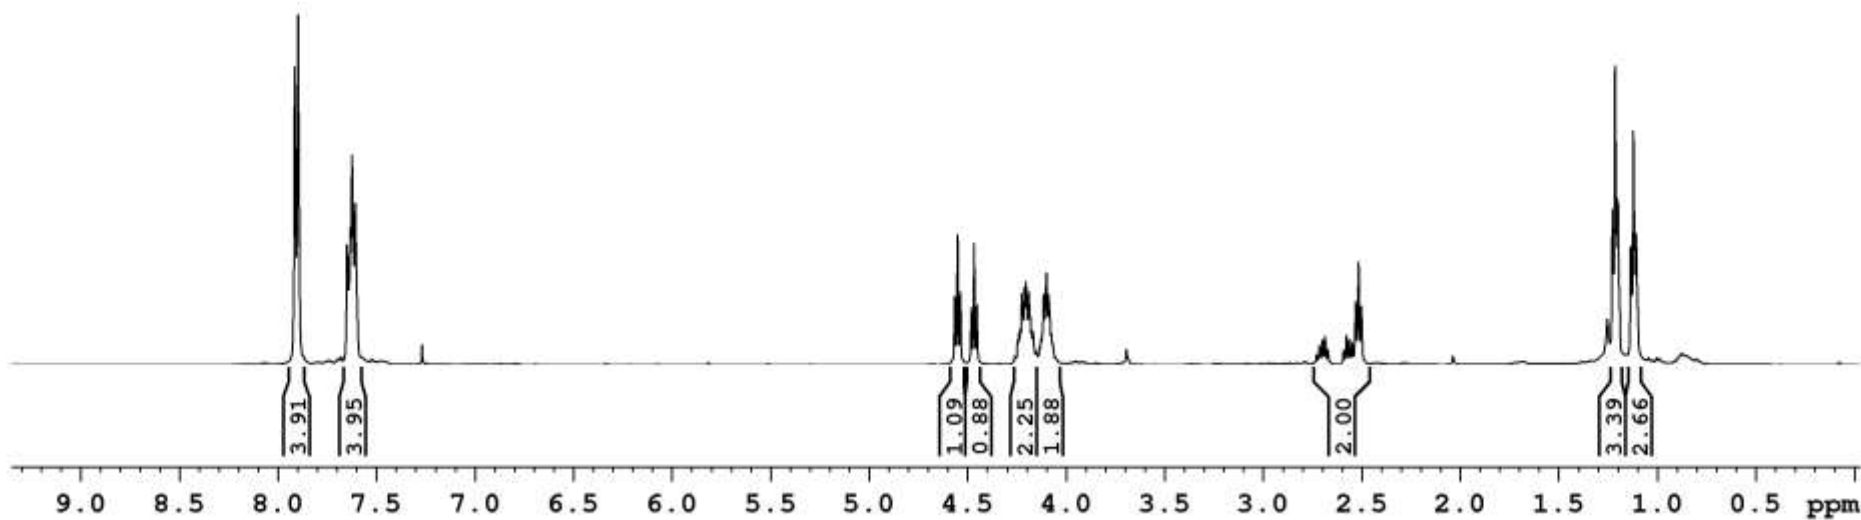



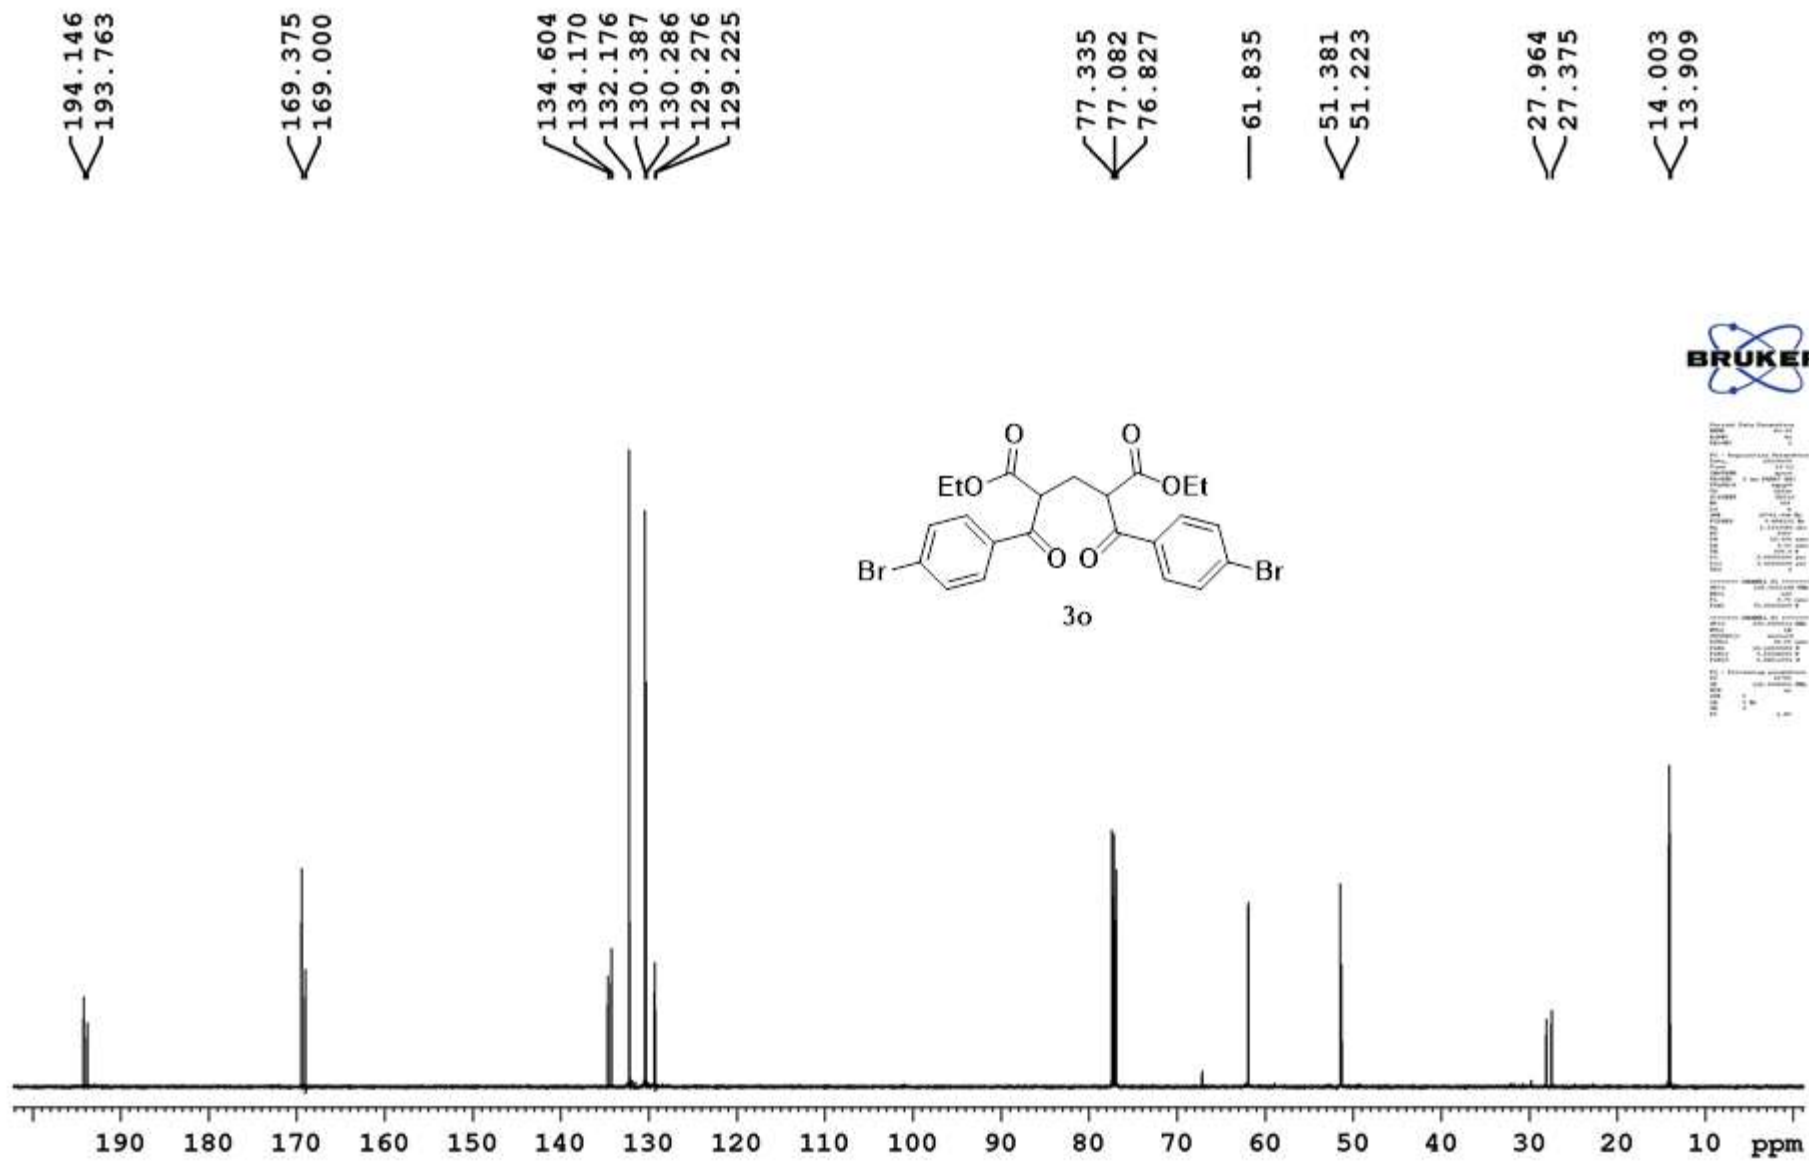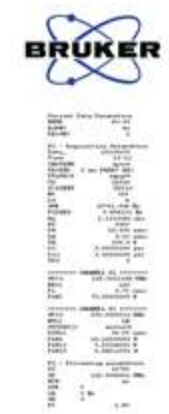

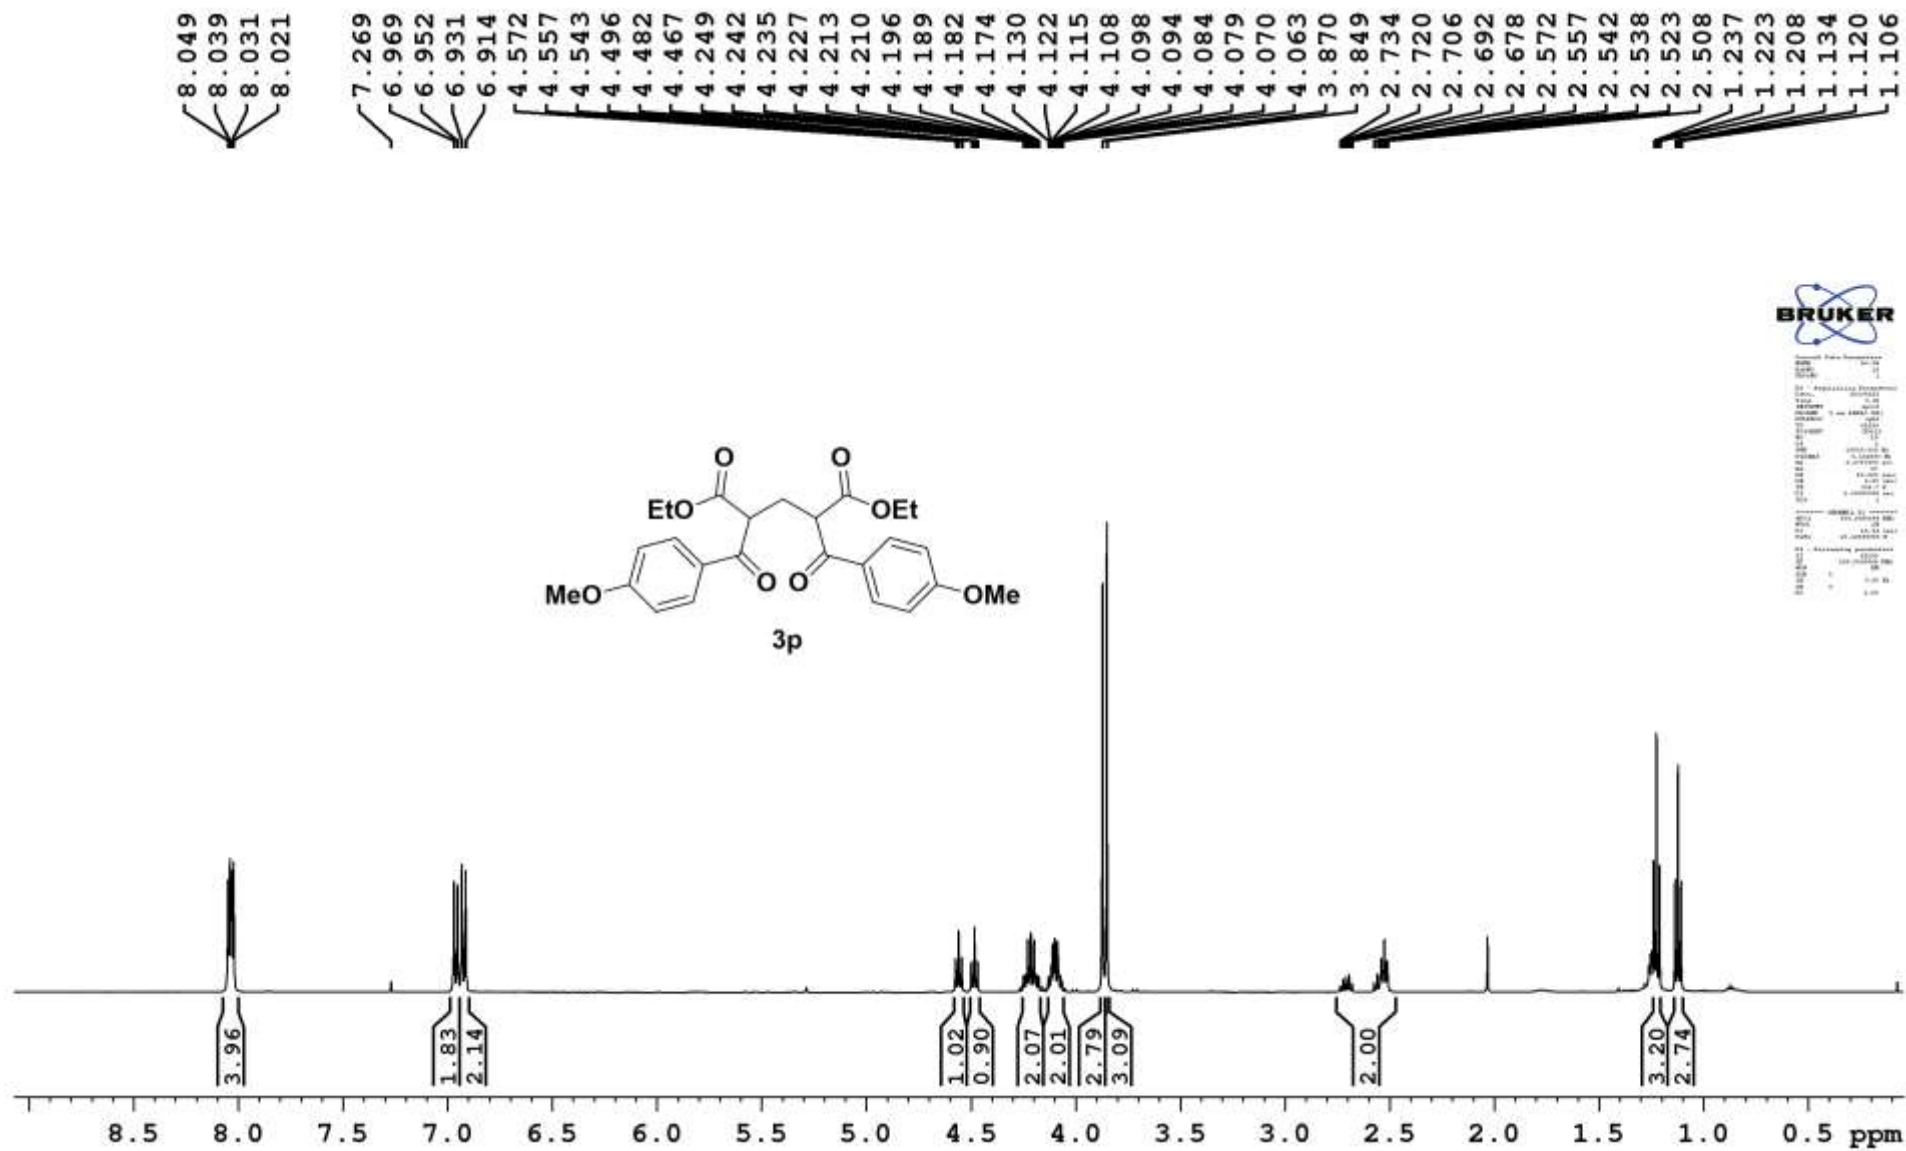

< 193.691  
< 193.294

< 169.944  
< 169.562  
< 164.089  
< 164.075

< 131.362  
< 131.270  
< 128.936  
< 128.441

— 113.985

< 77.318  
< 77.063  
< 76.809

< 61.512  
< 61.479  
< 55.525  
< 55.498  
< 51.360  
< 51.105

< 28.582  
< 27.951

< 14.029  
< 13.927

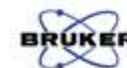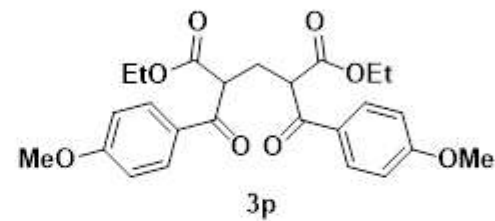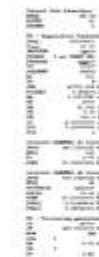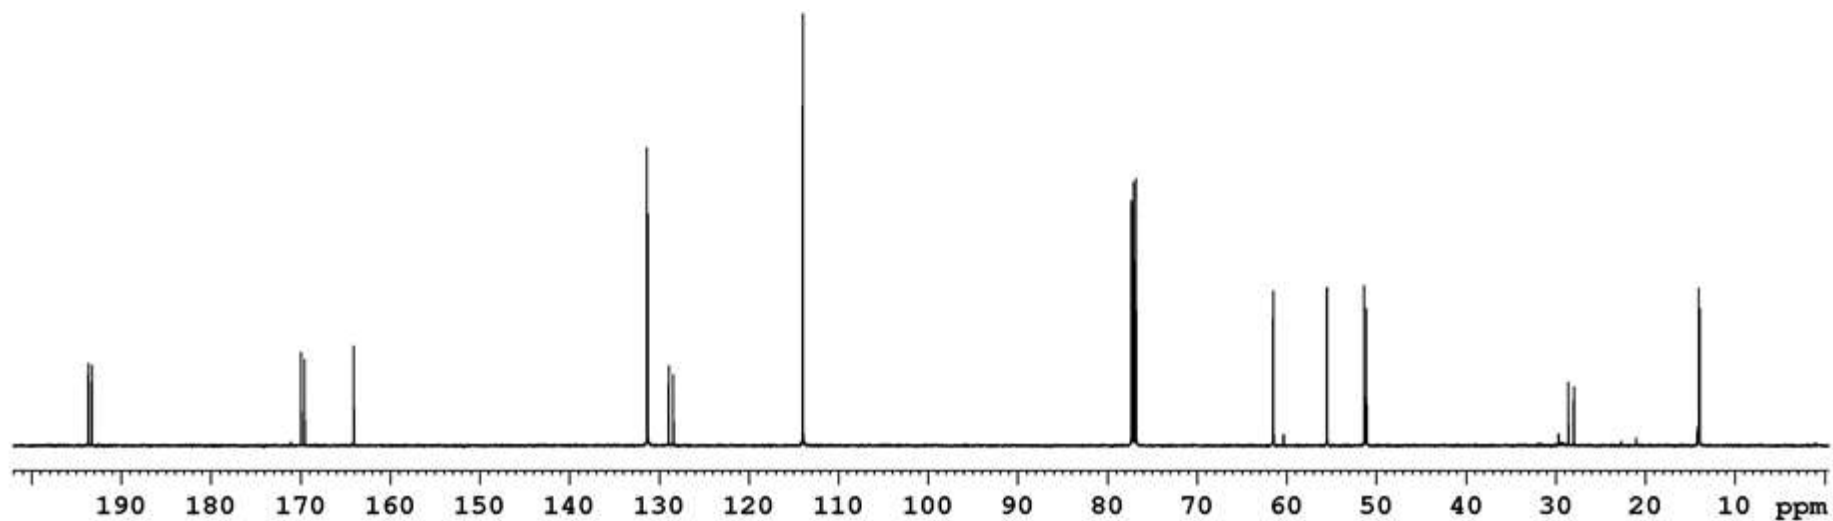





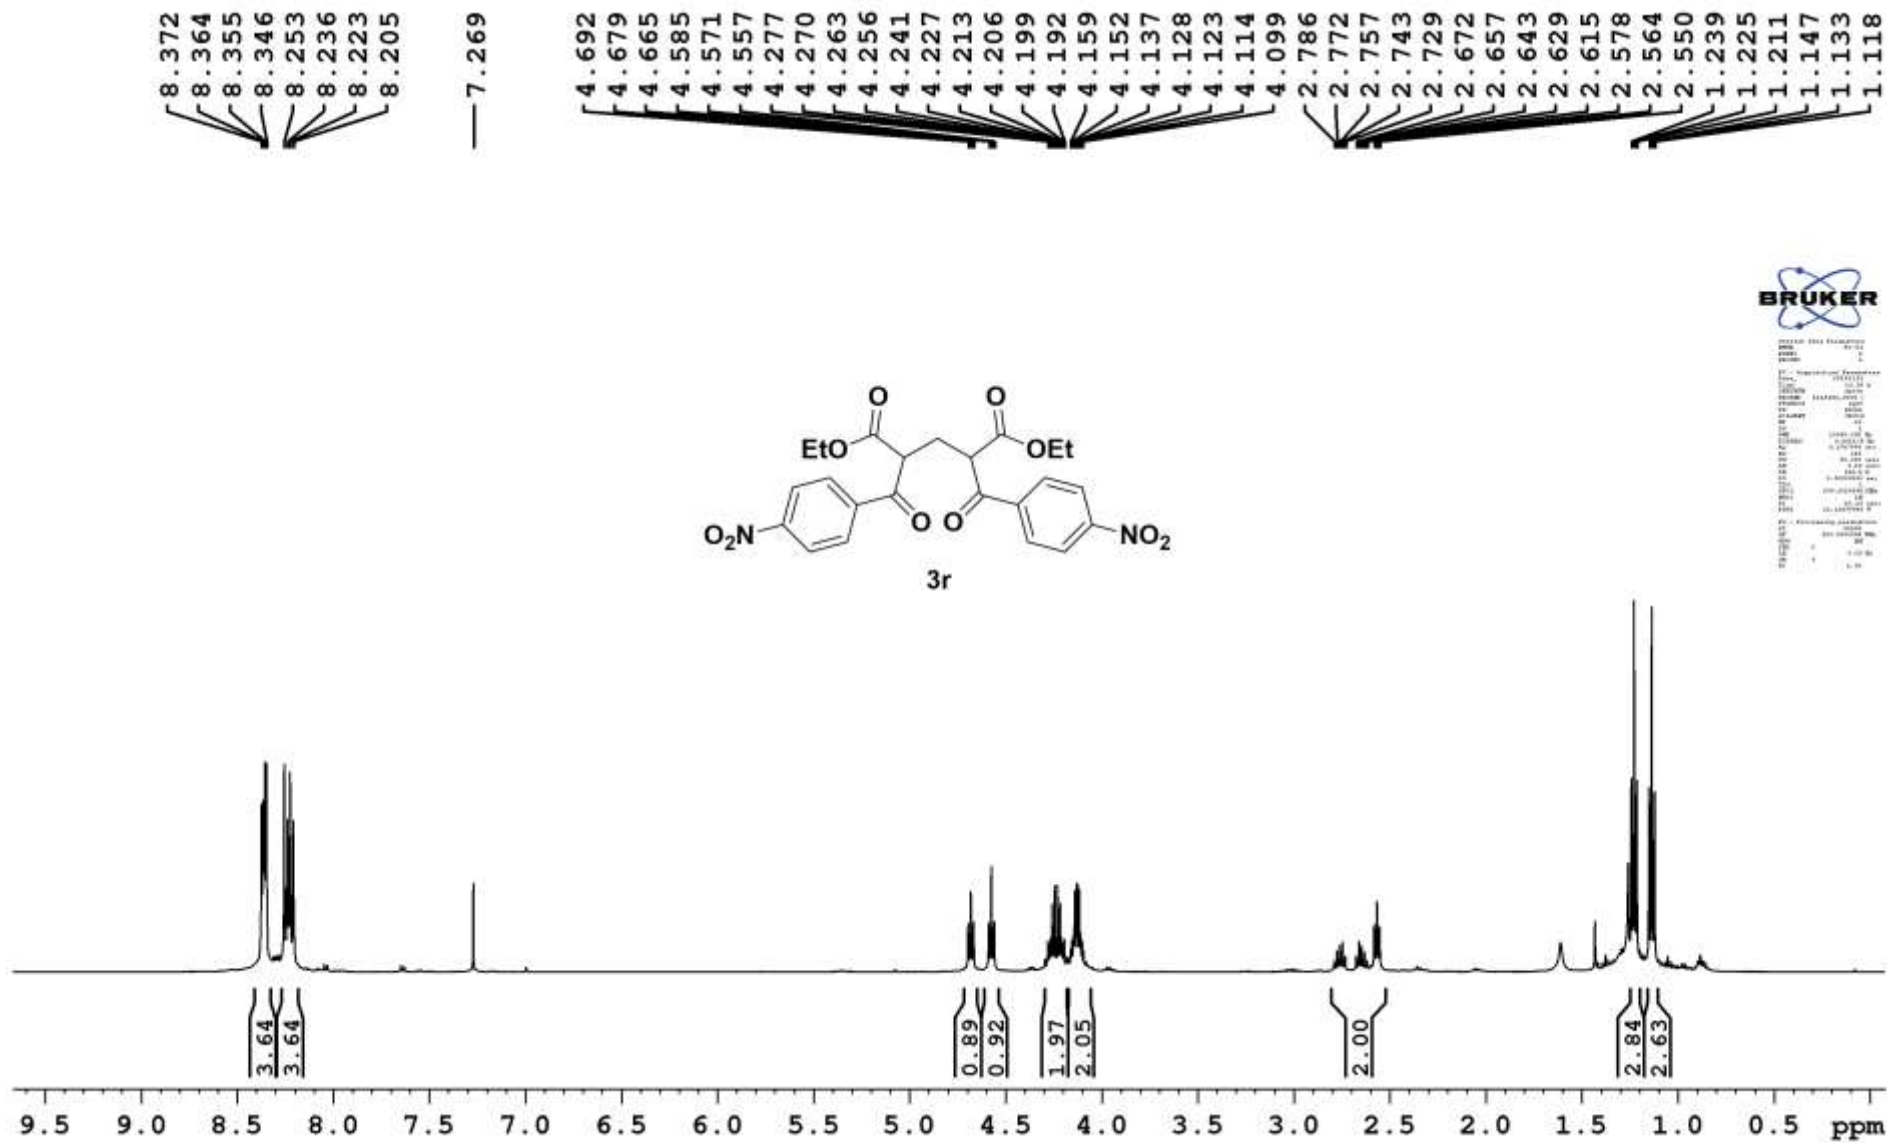





8.020  
8.017  
8.013  
7.990  
7.986  
7.983  
7.941  
7.938  
7.922  
7.920  
7.590  
7.572  
7.566  
7.550  
7.547  
7.469  
7.453  
7.444  
7.437  
7.429  
7.413  
7.269  
4.565  
4.551  
4.536  
4.488  
4.473  
4.459  
4.261  
4.254  
4.240  
4.225  
4.218  
4.204  
4.190  
4.182  
4.158  
4.150  
4.136  
4.122  
4.105  
4.084  
2.748  
2.734  
2.720  
2.705  
2.691  
2.614  
2.600  
2.585  
2.566  
2.551  
2.537  
1.235  
1.221  
1.207  
1.149  
1.135  
1.121

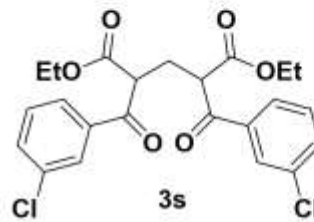

**BRUKER**

NAME: 3s  
EXPNO: 1  
PROCNO: 1  
PROCPS: 1  
F2 - Acquisition Parameters  
Date\_ 20110114  
Time 12.14  
INSTRUM spect  
PROBHD 5mm QNP 1H/13  
PULPROG zgpg30  
TD 65536  
SFO 400.1464000  
AQ 0.50000000  
RG 327.5  
SF 100.6260125  
FIDRES 0.18000000  
AQRES 0.39000000  
SOLVENT CDCl<sub>3</sub>  
NS 4096  
DS 4  
SWH 13172.000  
F2 - Processing parameters  
SI 32768  
SF 400.1464000  
WDW EM  
SSB 0  
LB 3.0000000  
GB 0  
PC 16384  
MC 0  
MD 0  
HM 0  
HT 0  
B0 12.5760000  
B1 0.0000000  
B2 0.0000000  
B3 0.0000000  
F2 - Reference chemical shifts (ppm)  
1H NMR (CDCl<sub>3</sub>)  
1.121 (t, 3H)  
1.149 (t, 3H)  
1.207 (t, 3H)  
1.221 (t, 3H)  
1.235 (t, 3H)  
2.537 (q, 2H)  
2.551 (q, 2H)  
2.566 (q, 2H)  
2.585 (q, 2H)  
2.600 (q, 2H)  
2.614 (q, 2H)  
2.691 (q, 2H)  
2.705 (q, 2H)  
2.720 (q, 2H)  
2.734 (q, 2H)  
2.748 (q, 2H)  
4.084 (q, 2H)  
4.105 (q, 2H)  
4.122 (q, 2H)  
4.136 (q, 2H)  
4.150 (q, 2H)  
4.158 (q, 2H)  
4.182 (q, 2H)  
4.190 (q, 2H)  
4.204 (q, 2H)  
4.218 (q, 2H)  
4.225 (q, 2H)  
4.240 (q, 2H)  
4.254 (q, 2H)  
4.261 (q, 2H)  
4.459 (q, 2H)  
4.473 (q, 2H)  
4.488 (q, 2H)  
4.536 (q, 2H)  
4.551 (q, 2H)  
4.565 (q, 2H)  
7.269 (m, 4H)  
7.413 (m, 4H)  
7.429 (m, 4H)  
7.437 (m, 4H)  
7.444 (m, 4H)  
7.453 (m, 4H)  
7.469 (m, 4H)  
7.547 (m, 4H)  
7.550 (m, 4H)  
7.566 (m, 4H)  
7.572 (m, 4H)  
7.590 (m, 4H)  
7.920 (m, 4H)  
7.922 (m, 4H)  
7.938 (m, 4H)  
7.941 (m, 4H)  
7.983 (m, 4H)  
7.986 (m, 4H)  
7.990 (m, 4H)  
8.013 (m, 4H)  
8.017 (m, 4H)  
8.020 (m, 4H)

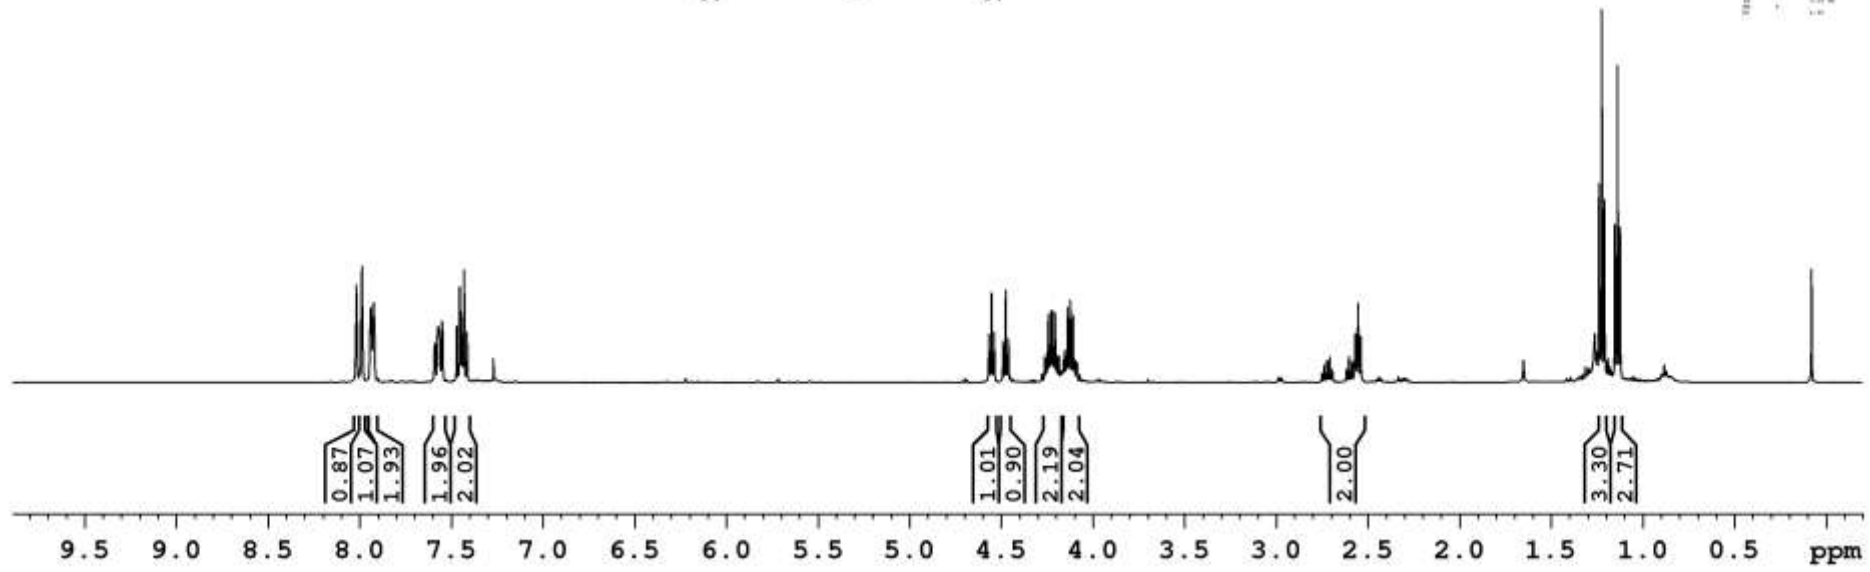











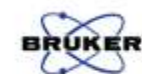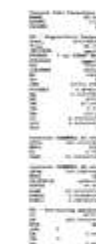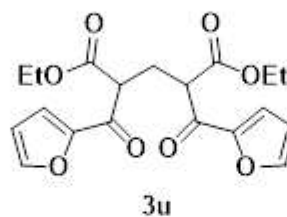

< 183.101  
< 182.969

< 168.942  
< 168.840

< 151.681  
< 151.483  
< 147.344  
< 147.286

< 119.269  
< 119.181  
< 112.653  
< 112.624

< 77.299  
< 77.045  
< 76.791

< 61.667  
< 61.657

< 51.577  
< 51.501

< 27.234  
< 26.776

< 13.969  
< 13.927

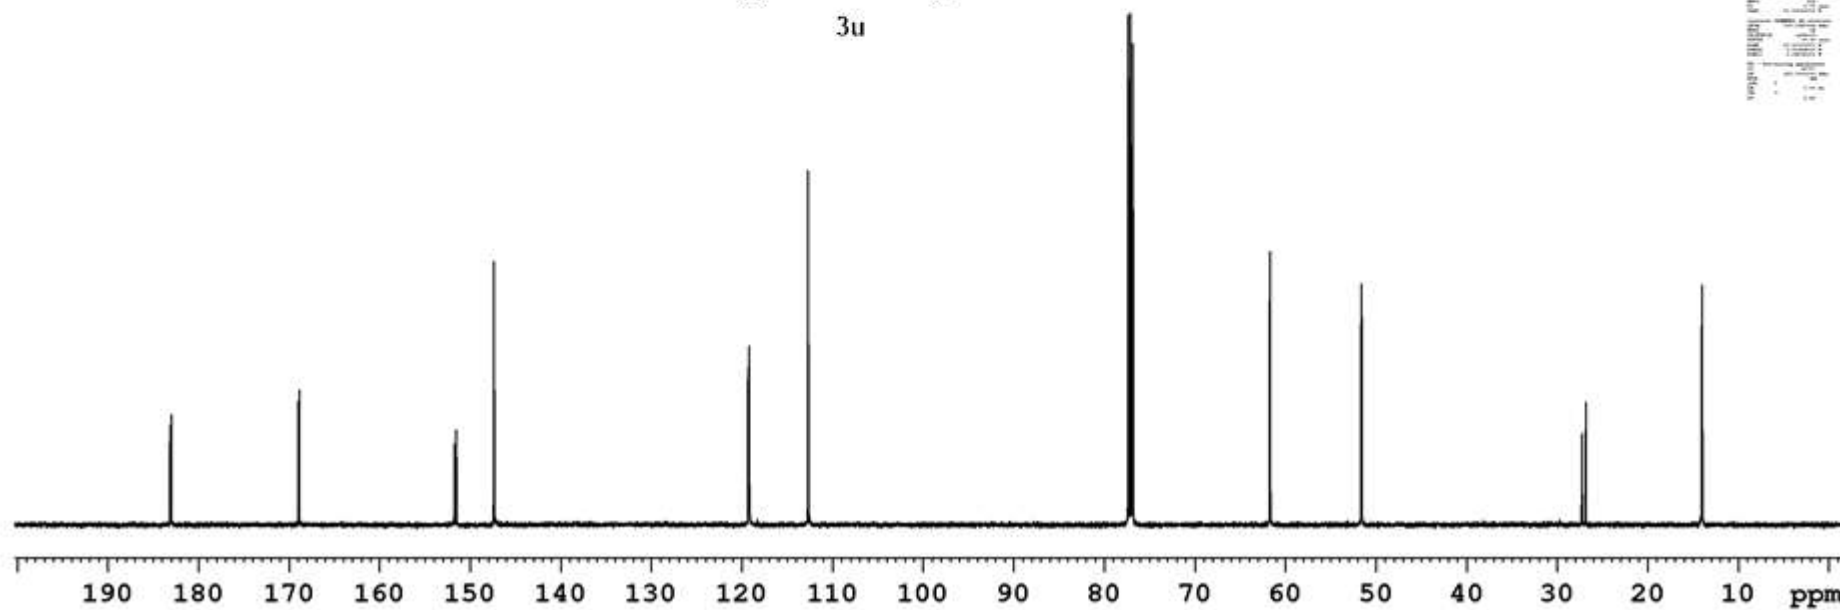

Supplement: c9cc10068g1.pdf [file c9cc10068g1.pdf]
